# Supplementary material for: Computational Characterization of the mtORF of Pocilloporid Corals: Insights into Protein Structure and Function in Stylophora Lineages from Contrasting Environments
Source: MDPI journal article supplement (doi:10.3390/genes10050324), 2019-04-27

Supplementary Figure S1. Transmembrane domains and pore-lining regions in pocilloporid corals.

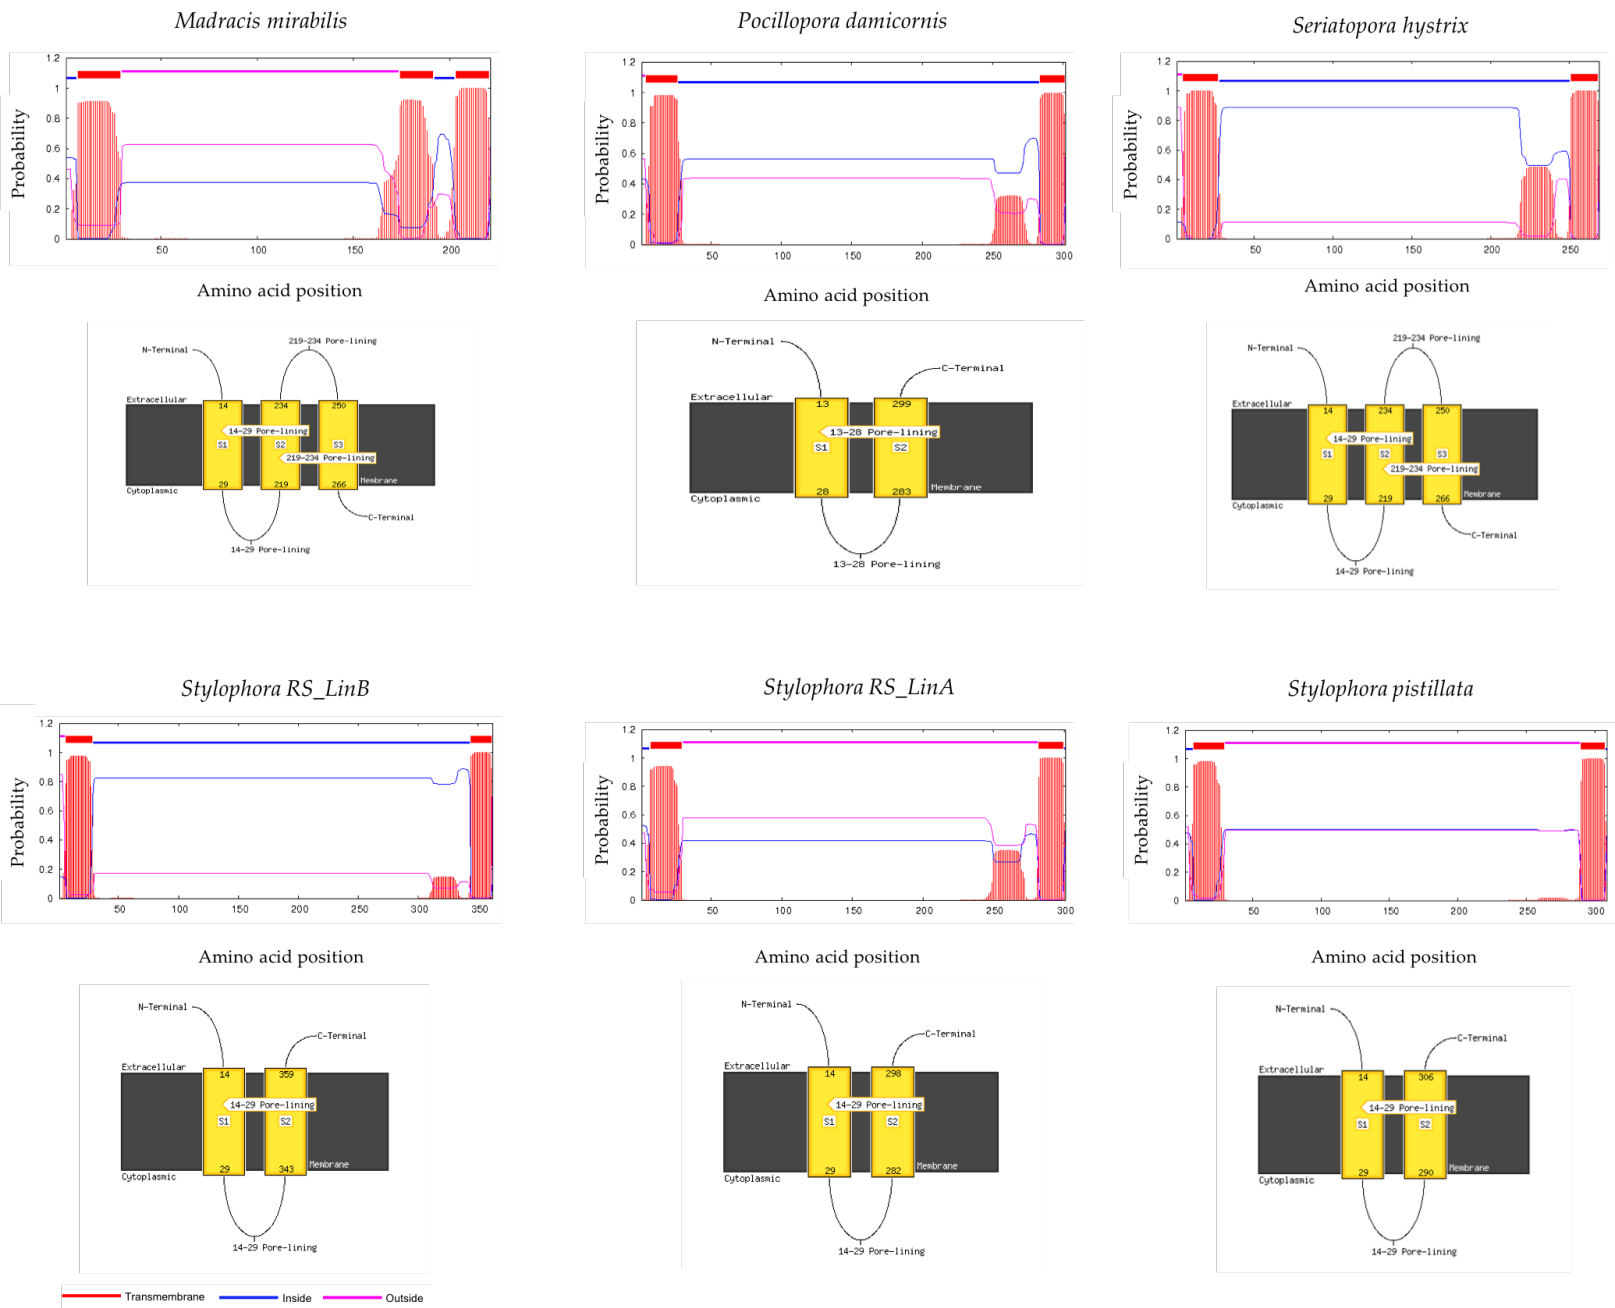

Supplement: s1 [file s1]
