# Supplementary material for: Computational Characterization of the mtORF of Pocilloporid Corals: Insights into Protein Structure and Function in Stylophora Lineages from Contrasting Environments
Source: MDPI journal article supplement (doi:10.3390/genes10050324), 2019-04-27
Supplement: s1 [file s1]

Supplementary Table S2. TRs motifs in Stylophora lineages and populations

| CLADE 1<br>(Stylophora RS_LinA plus Stylophora Indo-Pacific) | Consensus sequence                                                        | Period size | Copy number | Consensus size | Percent indels | A     | C     | G     | T     |
|--------------------------------------------------------------|---------------------------------------------------------------------------|-------------|-------------|----------------|----------------|-------|-------|-------|-------|
| RS_LinA, Red Sea                                             | AAGTGAGTCAGAAAGTAGAGGTAGTTTGAGGGAAAGTATAATTAAGGCATT                       | 51          | 2.1         | 51             | 0              | 38    | 2     | 33    | 25    |
|                                                              | AAGTGAGTCAGAAAGTAGAGGTAGTTTGAGGGAAAGTATAATTAAGGGATT                       | 51          | 4.1         | 51             | 0              | 39    | 2     | 32    | 25    |
|                                                              | ATGACGAGAGTTTGTGTGATAATGATAATCGTCTGTGTGTTCC                               | 39          | 2.6         | 42             | 4              | 22    | 7     | 33    | 37    |
|                                                              | TGTGTCATGACGAGAGTTTG                                                      | 21          | 3.7         | 20             | 12             | 20    | 6     | 36    | 36    |
|                                                              | GTTTGTGTGATAATGATGATA                                                     | 18-21       | 2.8-3.8     | 21             | 10-16          | 21-23 | 1-3   | 30-32 | 42-43 |
|                                                              | AATGACGAGAGTTTGTGTGAT                                                     | 18          | 2.4         | 21             | 13             | 29    | 4     | 33    | 33    |
|                                                              | AGTTTGTGTGATAATGAT                                                        | 18          | 1.9         | 18             | 0              | 25    | 0     | 31    | 42    |
| Madagascar                                                   | AAGTGAGTCAGAAGGTAGAGGTAGTTTGAGGGAAAGTATAATTAAGGCATT                       | 51          | 2.1         | 51             | 0              | 38    | 2-3   | 33    | 24-25 |
|                                                              | TGTGTCATGACGAGAGTTTGTGTGAATGATGATAGTTTG                                   | 39          | 2.4         | 39             | 7              | 21    | 6     | 34    | 37    |
|                                                              | ATGACGAGAGTTTGTGTGATAATGATAATCGCTTGAGTC                                   | 39          | 2.7         | 39             | 4              | 23    | 7     | 33    | 36    |
| Pacific Ocean                                                | AAGTGAGTCAGAAAGTAGAGGTAGTTTGAGGGAAAGTGTAATTAAGGGATT                       | 51          | 2.1         | 51             | 0              | 37    | 1     | 35    | 25    |
|                                                              | ATGACGAGAGTTTGTGTGATAATGATAATCGTTTGTGTGTTCC                               | 39          | 3.2         | 42             | 6              | 22    | 6     | 33    | 37    |
|                                                              | ATGACGAGAGTTTGTGTGATAATGATAATCGTTTGTGTC                                   | 39          | 2.6         | 39             | 0              | 24    | 4     | 32    | 38    |
|                                                              | GTTTGTGTGATAATGGATC                                                       | 18          | 4.8         | 19             | 12             | 21    | 4     | 32    | 41    |
|                                                              |                                                                           |             |             |                |                |       |       |       |       |
| CLADE 2<br>(RS_LinB)                                         | Consensus sequence                                                        | Period size | Copy number | Consensus size | Percent indels | A     | C     | G     | T     |
| Northern and southern Red Sea                                | AATTAGGGGATCAAGTGATTC                                                     | 21          | 6-11        | 21             | 10             | 32-34 | 9     | 29-31 | 26    |
|                                                              | CAATTAGGGGATCAAGTGATTCAAGTA                                               | 27          | 4-7         | 27             | 7-15           | 34-35 | 10-11 | 27-29 | 25-26 |
|                                                              | GGATCAAGTGATTCAAGTACAATTAGGGGATCAAGTGATTCA<br>ATTAGGGGAGCAAGTGATTCAATTAGA | 69          | 4-6         | 69             | 3-11           | 33-34 | 9-10  | 26-27 | 28    |

|                  |                                                                                                      |    |         |    |       |       |      |       |       |
|------------------|------------------------------------------------------------------------------------------------------|----|---------|----|-------|-------|------|-------|-------|
| Northern Red Sea | TAGAATTCGGGGATTAAGTGATTCAAG                                                                          | 27 | 8-20    | 27 | 5-12  | 34-35 | 9    | 24-27 | 28-30 |
|                  | AAGTAGGGGATTAAGTGATTCAAGTACAATTGGGGGATTAAGTGATT                                                      | 48 | 3.1     | 47 | 19    | 34    | 7    | 26    | 30    |
|                  | CAATTAGGGGATCAAGTGATTCAAGTACAATGCGGGCATCAAGTGATT                                                     | 48 | 6-7     | 48 | 16-17 | 33-34 | 9-10 | 27-28 | 27-28 |
|                  | AATTGGGGGATTAAGTGATTCAAGTACAAGTCAAGTCAAGTCAAGTAC                                                     | 48 | 5-9     | 54 | 13-17 | 34-35 | 9-10 | 25-27 | 28-29 |
|                  | CAATTAGAGGATCGAGTGATAAGTACAATTAGAGGATCAAGTGATTCAAGTA                                                 | 51 | 1.9     | 52 | 6     | 36    | 10   | 27    | 24    |
|                  | AAGTGATTCAAGTACAATTAGGGGATCAAGTGATTCAATTAGGGGAGCAAG<br>TGATTCAATTAGAGGATC                            | 69 | 2.6     | 69 | 0     | 33-34 | 8    | 29-30 | 27    |
|                  | AAGTGATTCAAGTACAATTAGGGGATCAAGTGATTCAATT<br>AGGGGATCAAGTGGTTCAATTAGGGGATC                            | 69 | 3.5     | 69 | 9     | 34    | 9    | 28    | 27    |
|                  | CAATTAGGAGATCAAGTGATTCAAGCACAATTCGAGCATTAAAG<br>TGATTCAAGTAGAATGAGGGCATCAAGTGATT                     | 75 | 3.3     | 75 | 5     | 33    | 9    | 27    | 28    |
|                  | CAATTAGGGGATCAAGTGATTCAAGTACAATTAGGGGATCA<br>AGTGATTCAATTAGGGGATCAAGTGATT                            | 75 | 5.3     | 69 | 6     | 33    | 9    | 27    | 28    |
|                  | ATCAAGTGATTCAAGTACAATTTGGGGATTAAGTGATTCAAG<br>TAGAATGAGGGCATCAAGTGATTCAATTAGGAT                      | 75 | 5.9     | 75 | 8     | 34    | 10   | 26    | 28    |
| Southern Red Sea | AATTAGGGGATCAAGTGATTCAATC                                                                            | 21 | 8.9     | 24 | 16    | 33    | 10   | 29    | 26    |
|                  | AATTCGGGGATTAAGTGATTCAAGTAC                                                                          | 27 | 8-17    | 27 | 7-10  | 34-35 | 10   | 24-27 | 28    |
|                  | CAATTAGGGGATCAAGTGATTCAATTAGAGGATCAAGTGATTCAAGTA                                                     | 48 | 2.5     | 48 | 0     | 34    | 10   | 28    | 26    |
|                  | AAGTGATTCAAGTATAATTAGGGGATCAAGTGATTCAATTAGAGGATC                                                     | 48 | 4.8     | 48 | 12    | 33    | 9    | 29    | 27    |
|                  | AAGTGATTCAAGTACAATGCGGGCATCAAGTGATTCAATTAGGAGATC                                                     | 48 | 5.8     | 48 | 17    | 34    | 10   | 26    | 27    |
|                  | TAAGTACAATTAGGGGATCAAGTGATTCAATTAGGGGATCAAGTGA                                                       | 48 | 5.6     | 46 | 7     | 34    | 9    | 29    | 26    |
|                  | AAGTGATTCAAGTACAATTAGGGGATCAAGTGATTCAATTAGGGGATC                                                     | 48 | 5.8     | 48 | 5     | 34    | 9    | 28    | 27    |
|                  | AAGTGATTCAAGTACAATGCGGGCATCAAGTGATTCAATTAGGAATC                                                      | 48 | 6.8     | 47 | 16    | 34    | 10   | 27    | 27    |
|                  | AATTCGGGGATCAAGTGATTCAAGTACAAGTCAAGTCAAGTCAAGTAC                                                     | 48 | 7.4-7.9 | 54 | 13-14 | 34    | 10   | 27    | 28    |
|                  | AATTCGGGGATCAAGTGATTCAAGTACAAGTCAAGTCAAGTCAAGTA                                                      | 48 | 7.9     | 54 | 12    | 33    | 10   | 27    | 28    |
|                  | GGATCAAGTGATTCAAGTACAATTAGGGGATCAAGTGATTCAATTAGGGGATCA<br>AGTGATTCAATTAGA                            | 69 | 3.9     | 69 | 2     | 33    | 10   | 27    | 28    |
|                  | CAATTAGGAGATCAAGTGATTCAAGACAATTCGGGGATTAAGTGATTCAAGTACA<br>ATTAGGGGATCAAGTGATT                       | 69 | 5       | 74 | 7     | 34    | 10   | 27    | 27    |
|                  | CAATTAGGAGATCAAGTGATTCAAGTACAATTAGGGGATTAAGTGATTCAAGTAC<br>AATGAGGGCATCAAGTGATT                      | 75 | 4.7     | 75 | 7     | 34    | 10   | 27    | 27    |
|                  | AATTAGGGGATCAAGTGATTCAATTAGGGGATCAAGTGATAAGTACAATTAGGGG<br>ATCAAGTGATTCAATTAGAGGAGCAAGTGATTATAC      | 90 | 2.7     | 91 | 10    | 34    | 9    | 29    | 26    |
|                  | GGATCAAGTGATTCAAGTACAATTAGGGGATCAAGTGATTCAAGTACAATTAGG<br>GGATCAAGTGATTCAATTGGGGGATCAAGTGGTTCAATTAGG | 96 | 3.7     | 96 | 8     | 34    | 10   | 27    | 28    |
