# Supplementary material for: Computational Characterization of the mtORF of Pocilloporid Corals: Insights into Protein Structure and Function in Stylophora Lineages from Contrasting Environments
Source: MDPI journal article supplement (doi:10.3390/genes10050324), 2019-04-27
Supplement: s1 [file s1]

Supplementary Data S1. Full mitogenomes of *RS\_LinA* and *RS\_LinB*

>*RS\_LinA*

TGTAAGAAAGACAAAGGGTTAGTCTTTGGGTTTCATGCCCAAATAAGTGAGTTCGAATCTCTCTCTTACACAAAATAAAAAATTATAAAAAAAGG  
AGGATAACTAAGATAAACTAAAATTAGACGATTTTTTCGAAATGGCGTTTCAGTTGCTTATTTGGTTGTTTCTCCAGAAAAGTGATTTTTTAATTTGA  
ATTGAAACATCTTATTACTAAGTAAAAATCAAACGAGATTCGAGAGTGGCGGAGAGTGAAATTGGAGTTGTGCTTGTGGTGGTCATAGATCTTGC  
TTAAACATTAGTTTATACTGATAATGAGAGTACTGTAAGGAAAAGTTGAAAGAGAGTTGAAAGGAATTTGAATTTTTATTTTTTGAAGTAGCTTTAA  
AAAAGCGTACCTTTTGTATAATGGGTAAAAGAGATTTATTTGGCATATTTAAAAATGGAAAAATTTTAAGTAATTTTTTTTTAGTCAAAATTTCCCGAAA  
CCAAGTGATTTAATCATAAATGTGTGAGCAAAAACCTGGTGATTGTGGCAAAAATCTCAGAAAATTTGTGATTAGGGGTGAAAGGCTAATCGAACT  
TGGAAATAGCTGGTTTTCTGCGAAAACCTATTTAAGTAGTGTCTTTTTTTTTTTATTTTAATTGTCATTTTAAAAAAAACAAAAATAAAAAAAGTA  
AACAAACAATAAATGAAAAGATTTTTTGTAAAAGAGAAAGCTCAAATCAGAAGCTATTGTCATTTTTTTTTCTTTAGTTTAAAAAAAATTAAT  
TTAGACAATAAAAAATGTAGGCTTGGAAACCAGCCATCTTTAAAAAGTACGTAGTTGTTATTTAAAAATTTTAAATTTTTTATAATTTTGATGGTTA  
AAATAAACAGAAAGCTCTGAAAATAATTATATATTTGTAGCAGATAAATTTGTTTTCGATATTTGAGTTGATTTCAAAATCTTTTTTAGTTTGAAAA  
ATTTTTTTTTAATACATCGATTTCAGTTGTAATAATTTTTACATAAGTAATCTAAATATTATTTTTTTTTCTTAAGATTACCTTAGTCAAGGATAATAC  
AGTTTCTAAAAAGAAATTTTTATGAAGATTTTTATAAAAAATATATAATCGGGAAGAAAAAGAACTGTTTTCTAATTAAGAAAA  
GAAAAAAGAAAAAGAAAAACATTTTTTAAAGAACTCGGCAAGTTAACTTCGACTGTTTACCAAAAACATAGCTTTTGTATCTTTATAAAAGTG  
AAACCTGCCCGATGGTTGTATCTTAATATGTTGTCTCGCTTACTAATAAAGACAATTAATGGCCGCGTAACACTGACTGTGATAATGTAGCGTA  
ATCAATTGTCAATTAATTGTGACCGGTATGAATGGTACCCCGAAAGTTTTCTGTCTTAAAAAATATTCATGAAATTAATTTGTAGTGAAGAT  
GCTACATTTTAATTGTAGACGAGAAGTCCCATGGAGCTTTACTGTAAGTTATATATAAAATTTTTTTTTTATAAGCAAGACAGTTTGTGGGG  
CGACAGTTTTTAAAAAGTAACGAAAATGAACATATGACGCATGTTAACTTTGAAATTTTTTAAATTGATGAGACATTTTGGTGTGTTTTGATCCG  
TTATTTTGAATGAAAAAATAACGAAAAACAATAAAAGTTACCTGGGGATAACAGCGCAATAGTGTTTGAAGATTAATTAACGACAGTTTGGC  
ACCTCGATGTTGAATTGTAACGTCCTACGGTGTAGTCACTCGTAAGGGTTGGTTTGTTCATCCATTAAAGTTGTACATGATTGAGTTAAAAGCGTGG  
TGACACAGCTTGGTTTCTATCTACAATTAGAAAACAAAAATATGTTGTTTTTCGTACGAAAGGATCAAAAATCAATAGTTCCTTAATATACTAT  
TCTTTAAATTAGGATTGCTTCTAAAAATAAAAAAGAAATATTTTGTGTGTGTTTTATTAATGTATCTTTAGTTTTATTTTTTCCCTTAATGTGGAGCTG  
TTTTAACAGGTTGTTTTGGAAGAAAAATTGGAGAAAGAGGAGCGGGGATTTAACTTCAAGTTGTTAGTTTTAGTTTGTCTTATCTTTTTAATCG  
CGATTGAAGTTTTATTTAATTCACAACAACGATTTTGAAATTATGAAAATGATTTGATTGGGATTGTTGTGTGTTTTTGGTTTTCAATTTGATGA  
TTTAGTAGTTATTATGTTATTTGTGTGTTTTATTGTTTCTACTTTGGTTCATATTTTTCTATTGCTTATATGCGGGGGGATCTCATATTCCTCGATTAT  
GACATATCTTCTTTGTTTACTTTTTAATGGTTTTGTGGTAACTAGTGATAATTTCTTCAATATTTATTTGGGTGAGAAGGGGTGGCCTTTGTCTT  
ATTTATTAATTAATTTTTGATTAACTCGATTAGAGGCAATAGAGCTGCTATTAAGCAATGTTAGTGAATAGAATTGGTGATTTGGGTGCTTTTA  
GCAATGTTTTACTTTGGGATCTTTTGGATCTCTAGATTTTCTACAATTTTAATCTATTTTTTTCTAATCAAAATATTTTTATTGTTATTTTTAT  
TTTTTGGGGTTATGGGAAATCTGCTCAATTAGGATTACATACTTGATTACCGGATGCAATGGAAGGTTATTGGGCCTTTTAATTAATAAATTAATTA  
AAAAAATTACTATACATTTAAAAAACAATTTATTAGTAAAAATAATGTTTATTAATGGACAATAAAATATTTATTTAATGTCTAAGAGACITTTATG  
TGATTTACTTTTTTTATTGATTAAATCTATTATTATTATTATTCCTTTACTTATTGCTGTGCAATTTTAACTTTAGCAGAACGAAAAATTTAGGGTA  
TATGCAATAAGAAAAGGACCAATGTTGTTGGAGGGGGGCTTCTCAACCTTTTGAGATGGGGTGAAATTATTTATTAAGAAATGATTTCTCCC  
CATCAAGCAATAAAATTTGTTATCTTTTGGCTCCAGTTATATCTTTACATTAGCTTCTTTGTTGAGGTTTTCTTCTTATGAGAAAGGAGTGAGTA  
TTAGTGATTTTAAATTAGTCTTTATGAATTTTGCTATTTCTCTATTAGTGTATTATGCAATTTAATGTCTGGATGAGGAAGCAAGTCTAAATATG  
CTTTTTTGGGTGCTATTCGGGCGGCGGCTCAAATGATTAGTTATGAGGTTTCAATTGGGCTAATTCATTATTTCCGTTTTATTATGTGTGTTCTTTAAG  
TATTACTGAAATGTTTTAGCGCAAAAATAATGGTATTTGGTTTTTTTTCCACTATTTCTGTTACAATAATGTTTTTGGCTTCGATTTTAGCAGAGACT  
AATCGTGCTCCTTTGATTAAACAGAGGAGAGTCAGAGCTGTTTCGGGATATAATGTTGAGTATGCTTCGATGCTTTTGCTTATTTTTCTTGCT  
GAATATGCATATTAATTTAATGAGTTGTTTAAACAACGATTTTTTTTTTGGGAGGATGGCTTTCTCCGATTCCAGATTTTAAAGGTGGGGCTGGATG  
GTTTGGTTTTAAAGTTGTTTTATTATTTTTTTTTTTTATTGAGTAAGGGCTTCATTTCTCGAATTCGATATGATCAGCTTATGGCTTTGTTATGAAAAG  
GGTATTTGCCTTTAAAGTTTAGGAATGGTCATTTTGTGGCTAGTGTCTCTTTGGGTTTAAATGGCCCCCTCCTATTTAAAAATTTTAAATTAATTA  
TGAAAAAAGAAAAAGAACTAACAGATTGCAAGTGCCATTACGAAAAAAGATCCTATTTATTTTAAATCAACGGATTTTAGTTGATTGGTTTC  
TCCTTCTAACATTACTTATTTATGAATTTTGGATCTTATTGGGATTGTGTTGATTTACAGATAGTCACTGGGTGTTTTTGTCTATGCAATATTGTT  
CTGATGTTAATTTGCTTTTGCTTCAATTGGTCATATCATGCGAGATGTTAATTATGGGTTTTATTAAGATATCTTCATGCTAACGGTGCTTCTTTGTT  
TTTTTTTTGTCTTTATGTTTCATATTTGGTCGAAGTTATATTATGGGGGTTATTTAAATTTTCATGTTTGAAGCATTGGAGTTGTTATTTTTTATTAACAA  
TGGCAATTGCCTTTATGGGCTATGTTTGCCTTGGGGACAATGCTTTTTAGGGGCAACGTGAATAACTAATTTATGTCTGCTATTCCTTATTTTG  
GGATTGATATTGTTCAAGTAGTGTGAGGCGGGTTAGTGTTCAAATGCAACATTAATACGGTTTTTATGTTACATTTTTTACTTCCCTTTATTTTAGT  
TTTTCTGTATTTCTTCAATTTAGTTTATTTACATGTTGATGGGTCTAATAATTCACAGGATTAATTTCTTCAATTGACGGAGTTTCAATCCATACATTTT  
ATACATCAAAAGATTTTTTGGTTTTTTTTTCTTTTTTTTTTATTTTGTTTTTTGTTTTTTTTTTGCCAAATTTATTAGGAGATGCTGAAAAATTTATCA  
AGCGAATTCCTTTGGTTACTCCGGTTCATATTCACCAGAATGATATTTTTATTGCTTATGCAATCTTACGTCTATACCAATAAATAGGTGGGGT  
TATGCAAGTTTGTAGTATTCTTATTTTATTTTTTATCTATTTACATCAAAGTCTTTAAAGGGGCTTTTTTTCGTCCTTTAGGTGCAATTCGATT  
TTGGTTTTTAATATTGATTTTGCTTTATTAACCTGAATTGGATCAACAAGTTGTAGAAGAACCTTTTATTTAATTGGTCAAAATACTCTTTTTTTTATT  
TTTTTTATTTTTTAGTTTTAATACCAGTTTGGGTATTATTGAAAATCAATTATTAATAAAAAATTAATGAAATTTTTGTTTTAGGGGTTTTCTTTTGA  
GCTTCGTGGTTTTAAGTCTTCGTATTTTCTTTTAAAACTTTCTCTTTTTTATTAATTAATTTATTTTGTTTTTTTTTTAAAAATAGAATGGGCAAGCT  
TTTGGTTTTAATTGGTTCTTTTGTCTATCTTTTATTGGACCAAAAAAGAGAACAACAGATGTGCTATTTAAGTTTAAATTTATTTGTTTTGGA  
GTTTTTGTTTAATTTCTTCAAGTAATTGACTTCTATTTATTTAACCATTTGAACTTTTTACTCTTTGTTTTTTATTTTGAATGCTCGAGGGTCTGGTTAT  
AGTGTGGAAGCAGGATTAATAATTTTATTTGGGTGCTTCTTCTGTGTTATTTTTATTGGGTGTGCTTTATTATGTGGTATTGGGGCTAATATAC  
ACTTTTCTCATATAGAATCTTTTTAATTCAAAAACAAGTTTTTCTGTGTTTCGATACCAATTGGGTATCTTTAATTAATGTGTCTTTTTTTTTAAA  
TTATCAGTTGCTCCTTTTCATATGTGAGTTCCTGATGTTATGAGGGGCACTACTAAAAATGTTCTATTATTGGCTATTGTCCAAAAATAGGGTTT  
TTTTCTTTATAATTTCAATTGGATTCCTGTAAATTTTTTTTTTTTAGGGATCTTTTTTCTTTGTTTGTGTGGAGCTTTGGGTGCTTTAAATCAAACTAA  
AATAAACGACTTTTGGCTTATAGTGGGGTGGTCATATGGGCTTTATTTATGAGGTTGGAAAAATGGTCTTTTGAAAGTTTACAAGCTAGTCTTG  
TTATCTTTTTATATATATTGTGATGACAATTTGTGCTTTTTCTATTATTAAGTTTAAATGTTTATAAAAAATTTGCTGTGTGAATTTAGTGGAATTTCT  
CGATACTTACCTTTTTTTTTCGATTACCTTAGGTGTCTTTTTTTCTATTGTCAGGAATTCCTCTTTTGTCTGGATTTTTTGGAAAAATGATTTATTTGTTA  
TCTGGAATCTTTCTAAATCATATTTTATTTTTTTTTTGTCTTTTTTGTCTGTATAGCTGGGTTTATTATATTCGAATTATAAAAAATACTTTTTTTT

CAAAAAAATCTTTCTTTAATTACAATTAAGGCCTTAAAAAAGAATCTAAATTAATTTAAAAAAGTTTTTTAATTGGTTTTGTTTTATTTA  
TTCTTTTTTTTTCTTTCTCCACATTTTCTTTTTTTTTTTTTCTCAAAATAATTTTGATTTATTTAAAAATGGAATTTTTTCTTTTTTTTTATTTAGGG  
ATAATTGGCTCAGGAGTAATGGTTGTTTCAGCGTTAAATCCTGTTCTTCTATTTTTTGATTGGTCTTGTTTTATAAAATCTGCAGTTTTTCTCTTT  
ACTAGGAATAGATTTTCTGCTTTGATGTTTTACTTATTTATGTTGGGGCAATAGCTATTTTATTTTATTTGTTATTATGTTATTAATCTAACTGACT  
ATCCTCCGGTTTTAAAAAGAGAGGTTGATATGACAAATTATATACCAATTGGATTATAATTGGGATTTTTTTTTTTCAGAAATGCTTCAAGTGGA  
TTATTTTTGGGTTCTTTTCAAAATAGAGAAATTGAGACCTTTCTTTCCCTGATTTCTTATTTCTTATCATAATATTGAGGCCTTAGGGCAGATTTATATGT  
TTCTGTTTTTTGTTTATTCTTTTGCCAGTTTTATTTTATTAGTTGCTATGATTGGTGTGATTGTATTAACCAAGAAACAGAATTTTTAAGTAAAAAA  
CAAGATCTTTTTTTCAAATAAATAGATAATGAATAGCTCTTCTTATTTTGAACAATTTAACATAGTGTGAATGTTGGTTTTACGAATTCACAATA  
ATGATGACTTTTGTAAATTATTGTTGTTTTATTACTTTTTAAAGGAATTGAATTAATCCAAAAAGATGGCAATCGGTTTATGAATATCTAGAAAATTAT  
TTTTATTATATAACAGTGCAAAATTTAGGAAATGTGGGTTAATATATTTTCTTTTATTGTTTCACTTTTTGTTTTTTAGTTTTTTAAATAITTTAGGC  
TTATGTCTTATGTCTTCACACCGACAACCCATATTGTTAATACGCTTGGATTTCTTTTTCTATTGTTATTGGAGTTACTTTTTCTGGATTTTATAAATT  
TAAAAAAGACTTCTTTAGCATTTTAAATGCCTAGCGGCGCTCTTTAATTTAGCACCATTTTAATTTTAAAGAAACAGTAAGTTATATTTCTCGAG  
CTGTTTCTTTGGCATTCTGTTAGCAGCAATCTTTCTGCCGGCATCTTTTATTTGCAATTTTGGCAGGATTGGTTTTAGTTTTTAAATCAGCAATGTC  
TATAAATGGTGTTTATTACTTTATTGGAGGTGCCCGTTCGGTGATCCAAGCGTATGTTGTTTGTCTGCTGACATTAATTTATTAGCAGACAAATTTT  
TCTACACTAATCATGAGCGGGTAGAAAATTTTTTATGCTCATTAAATGGGTGTGTCGGTGTGTGTAATTATGCGTTTATGATGGCTTGATACAGCCA  
ATCTTCTCAAAGGTGACTTCAGCATCAAATGGATCTTCCAGAGAATACTGAATACGTGCATCCTTGAACTTATTATAGTTATGTGCCCGTCATGGT  
ATTGTTCAATAATGGTGGGTTACAAGTAGATCAAGAATCCAATGGTGCTGATCGGCCAAGAGATGTAATTTTTATCGATTTAGAAAGCGGACAAGTG  
CCCTTAAGGGGTGCGCGAGTTTTTAGGGTGGCGGAAAAATGACGAGAGTTTGTGTGATAATGGTAATCGCTTGTGTCATGACGAGGGTTTGTGTGATA  
ATGATGATCGTTTGTGTGTTCATGGCGAGAGTTTGTGTGATGATGATAGTTTGTGTGATAATGACGAGTTTCAAGATGGGGTTTTGCATTTAAGTAAA  
AGTGCAAGTGAGTCAGAAAGTAGAGGTAGTTTGAAGGAAAGTGAATTAAGGCATTAAAGTGAGTCAGAAAGTAGAGGTAGTTTGAAGGAAAGTAT  
AATTAAGGGATTAAGTGATTCAAGAAGCGAAGACGAAGCGTTAAGGGCACTAGAGGTAGAAACACATTTAAGTGGTGGCCAGTTAGCGCGTACA  
AATCAAGGTGAGGCAGTTGAATCGACTCTTAGTTCGATCCCTTTGAGGTTGAAGGATGATGGTTCTGTGTGAATAAATCAATTGCGATGCTGTTTA  
ACATATTGGGAGATAAGCCCCTGGTGAGCTGCATTTTTTATGTTATCAGCTTTTAAAAATAACAAATCAAATGCCAAACCCATGGGTTTATAGGTG  
ATTTATTTTGGTATATATTTTATTAATCTTTGTTTTTAAATGATTTAGTTATCTTTTATTAATAGAGTTGAGAGAAAAAGTTTTAAATGGTCTTATT  
TATTTAATGTTATTATGGCATTAGTTAACATCATAGGGACAGCGAGGGAGAGAAGATGTGTTTTAAAAAAGCGGGCTTTAGAGTGGTCTTTGGCTT  
TATGTATTAGTACTTTAGTTTTTTGGGGTGGATTGACGGAGAAAGTCATTTTCAATTTTTTATGTTTAGTAGAATGAAATATATTTTCTACTTTAGATTG  
AGGCCCGATTGTTTTGTCAGTCGATGGTGTCTTTGGTTTTTTATTTTTAACGACTTTTTTAAATCCAATTTGATTTTAAATAGCCAAAAATCAATA  
AAATTTTTATTTAAAGAATTTCTTTTGCTTGTTTTTTTATAGAAGTTTTATTAATAGGTGTTTTATAGTGTGATCTTTTGTGTTTATCTTTTTTTG  
AGGGGATATAATACCAATGTTTTTTAATTTGGTATTTGAGGCTCTCGAGAAGAAAAGGTCTGCTCTCTTTTATTTTTTTTTTTTACTTTTATAGG  
CTCTCTTTTTTTTTTTTTTATAAATACTTTTTATATCAAAAGGATTGGAAACAACAGACTATTTCTTTTACTTAATATAAATTTTAAATATTCAAA  
AATGAGCCTTAGTTGGGATTTTTCTTAGTTTTGCGGTGAAACTACCTCTTATTCATTTTATGATTGCCACAAGCACATGTTGAGGCTCCTGTTG  
CGGGCTCTGTTATTTTGGCTGGAATTTTATTAATAATAGGGGTTATGGCCTTTTGCCTTTTTCTTGACCTCTTTTCCGGGGGCTCTTTATATTGGTCT  
CCAGTTATTGTTTTTTTAGTGTGTTGCTGTTGTTATGGAGGCTTAATGACATGTCGTCAAATTGATTTTAAACGGCTGTGCTTACTCTCTGTTGC  
TCATATGGGACTGTGCCCTTTGGGTCTTTTTACACATGTTATAGAGGGGTTAATGGGGCTCTTTTTTAAATGTTGGCGCAGGAAITGTAGCTCTGC  
TCTTTTTATGGAGTAACTTTTTGATATGATCGCCACCATACTCGTTAATAAAAATATTATCGGGGTTTGACTTTGACAATGCCTCTTTTTGTTATTACA  
ATGTTAATTTTGTCTTTGGCGAACATGGGTTTTCTCTTAGTTGTAATTTTGTGGAGAATTTTTTCTTTATTAGCAGTCTTCAATATCATTATGGAGT  
TGGAAATGTTGTTATTTAGGGGTCTTTTTCTGCAATTTATCTCTTAGTCTTTTAAATCGTATTTCTTTGGTGGAGGATCAATTAATTTACTTTTTAA  
TAGAGACTTAAGTCGACGAGAGATTTTTGTAATTTTTCTTTTTTAAATATCTTAGGGGGGGGATTGTCCTTTTCTTATTTAGTATTAAATATAA  
AATAGTCTGTTTTAGCCAGGGGTTAGTCTGGGTTTTAGGGAAAAAAAATATTAGTCTAGGTATACATGCTAGTGTATGCCAACAGGTG  
AGGATAAAAATAAAAAATTTTTTTTATTGTTGTATTAAAAAAAGAAAAGTTTTTATTTCTTTTTTGAAGATGCATAGTTTAAACCACATTTTACTGA  
AACAAAAGAAAACCTTTGGCAGCAGTAATGGATTTTATGTAATATACGAAAGTAAGACATAGGTGGGATAAAAAAATCTGTCAAATATAAGTGC  
CAGCAGACCGGTAATACTTAAGGATTTATTTTTTAATAAAAAGCAAAAAGCGTGTTAAGGATTTTAAAAAATAAATAAGATTTTTTT  
CGTAATGTGAAATGTGGAATGAAAAAAGAATTTTTATATGAAAATAATTTATTTTTTTTTCTTAAATACGAAGTTTTGGGAGCAAAACAGGAT  
TAGAGACCTGTTAGTCTATACAGTAAAAGAATATCGCTTGAGTAGTACGGTCGAAGATTGAAATTCAAAAGACTTGGCTGTTCCGTTGTTAATTA  
GAGGAGCGCGTCTTAATTCGATAATCCGCGAGAGACCTTACCGAAGTTGAATTTATTAACAGGTGTTGCATGGCCGTCGTCAATTTCTGTTGA  
GACAAAAAGGGTTAATCTCATCAAGGTTGAAGTCAGGTATATGACCTTATATTTCCGGGTTAGGCGCGCTACATTTTCTTCTTGAAGAAAGGAG  
GGGTTCGAGATTGTTTTAAATAAGATAATGAAGTTGGATTTAATAGTAATTGAAAAGTAGTGCCTTCAATGAACGTGAAAAAATGTTAGTACA  
AATAGCCCGTCGCCAGCCAGAAATAGGCTGTAAGTCGTAACATAGTAAGAGTGAGGGAACGGCTCTTGATGCAGTTTCATTCGTATCATTTAGTT  
GAGCCTCTCCATGGCCTTTTGTGGAGCAATGGCTCTTTTTTATTACTGTTGGTGCAGTGGTTTTTTTTCATTATGGGTTAGTTTTTTTTATATTG  
GGGCTTTTGGTGTGTTGGAGTTATGTTGTTGATGACAAGATGTTATACGAGAATCAACTTTCAAGGTCAACATCTTAAATGTAACAAGG  
GATTAATATGGTATGATTTATTTATCTTTCAGAAATTTGTTTTTTTTTCTTTTTTTGGGCTTTTTTTCATAGTAGTTTAGCACCGGTGTTGAACT  
TGGAGTTGTTGGCTCCACAAGGAATTGTGCATTAATCCCTTTTCTGTTCTTTTATTAACACTGCTGTATTATTAAGTTCTGGGGCAACGGTTAC  
ATGGGCGCACCATGCAATACTCTGTGTTTAAAAAAGAGGCTCAACTGCTTTATTTTAACTCTTTTTTGGGTGTTATGTTACGGGTTGCAAG  
CATTTGAAATATTATAGGCGCTTTTACTTTATCTGACTCTTTTATGGGGCCACTTTTTTGTGTCGACAGGGTTTCATGGACATGTTTAAATTTG  
GTACTACTTTTCTTTTTATTGTTTTTACGTTTACTCTCTAATCAATTTACTCGTCGTCACATGTTGGGTTTGAAGCGCGAGTTGATACTGGCACTT  
TGTCGATGTGGTTGATTATTTTTATATTTATGATTTATTGATGAGGCTCATAAAAACTTCTTAAATGCAAAATCTTTTTGTTTTTACTTTTTTATAGATA  
TTTTATAAATGTTTTGGCTTGGTGTCTGTCTCTGGTTAATCATCTTTATTAATTCGGACAGTCCAGAGACTTGACTTTTAGAGTTTCAAGATGTTGGG  
GATCCTATTGTAGAAGAAATGTTTTTTTTCATGACCAAGTATGTTTTTATTAATTTATATAGTTACTGTGTGTTTATGACTTTTTGTGAATCTTTAA  
AAATAAGTTTTATGATCGTCATTTAATCGATGGTACATTTTAGAAAATGTTTGAACGATTATTCCTGCTGTTATATTGATTTTTATTGCAATGCCCCTCT  
CTTAAATTATTATTTAATGGATGAGGTTATTTCTCCAGCTTTGACAATTAAGTTATTGGGCATCAATGATATTGATCCTATGAATATTTCTGATTAT  
GAAGGGGATACGTTAGGTTTGAATCTTATATGATTCCTACTTCGGATTTAGTTTCTGGAGAGAATCGTTTGTGTAAGTTGATTATAAACTTTTAAAT  
CCTATTCAAAACACATATAAGATTTTTTATGTTACTGGGGCAGATTGTTTACATTTCTTTGCAAGTGCCTTCTTTGGGGTTAAAAAATTGATGCGGTTCCGGGT  
CGTCTAAATCAAACCTGGTGTTTTTATAAAACGAGCCGGGTTTTTTTTGGACAATGTTCTGAAATTTGTTGGGGCAAAATCATTTCTTTTATGCCAATTGT  
GATAAAGGGAGTTGGTTTAAATGAATACGTTCAATATTTAAATTAATTTAAATGATTATAAATACTTAGTTATTATTATTTATTTTTATTGGGG  
AGTTGGGGTATAATTTAAATAGAGGACATTTTATTATTGCTGTGTTCTATTGAATTAGTTTATTAACAACCTTTTTTTTTTTTTTAAATAGCTCTAA  
AGAAATAGATCTTTTAAATAGAACAAATTTTTATGATTATGGGATTAACCTATTGCTGCGGCAGAATCTTCAATTGGTTTAGCTATTTTAGTGCATATT

ATAGAATTCGAGGAACAATGTTTTAAATCTTTAGTCTTTGCGAGGATAATGATTAATCTTTTATTTTTTTTTCTTATTTTATTTTGGCGGGGT  
TATTTATATTTTTCTTTTTGATAGGGGAAAAAATCCAGATCGAGAAAAGGTTTCGCTTATGAATGTGGTTTTGCTCCCTTAAATTTTTAGGGCA  
CCCTTTTCAATACGTTTTTTTTTAATGGTATTTTATCTTGATTTTGAATTTAGAAATCTCTTTTTTTTCCCTGATGTGTTTATATAATTCGACTGCT  
CCGTTTGGGTTTTGAACATGATAGGTTTTTTTTTGATTAAGTTTTGGGTTTGATATACGAATGAGTAATGGGGGGTTAGAATGGGAGTAAAAAGA  
GAGTAAAAAGAAAAAGTCTATCTATTATGAAAAATAAGAAATTTATACCAACTCCGGTTTCTGCTTAAATTCATGCTGCAACGATGGTACTGCA  
GGTGTTTTTTATTAATTCGTGCTTCCTTTTATTGATGTGTTCCTTATATTAATTAATTAATTCGAATCGTTGGGGTTTTAACCGTGTATTATGCAAG  
GACAAATGGTTTAGTTCAAAAATGATTTAAAAAAAATAATCGCTTATTCTACTGTAGTCAATTAGGTTATATGGTTGTGCTGTGGGCTTCTCATT  
TGCAATTAGTCTTTTTCATCTTATGAATCATGCTTTTTTCAAAGCTTTATTATTTTTGAGTGCAGGGTCTCTTATTCATGCGGTAATTGATGAACAAGA  
CATAAGAAAAATGGGGGTTTATTATCTTTCTTCTTGAATGTTTTTTTTTGATAGGCTCTTTTCTTAAATGGGGTTTCTTTTTAACAGGAT  
TTTATTCAAAAAGATTAAATTTTAGAATTTGCTTTTGGACAATTTTATTAAATTTTGTGTATGATTAGGTGTGTTTTCTGTTTTAATAACAATTATATAC  
TCTATTCGTTAAATTTATTTAGTTTTTTATCCAATATTAATTTAAACGAGCAAAACATTTTTTTTCTTAAAGAAGGAGAATTTTATTTTTAATTCCTTT  
GGGTATATTAACTTTAGGAAGTGTTTTTGAGGCTATTTAAGTAAAGAAATAATTTGGTCTTTTCAAATAGATGTTTTTCAATACTTTCTTTAAAAAT  
AAAAATATTTCCAATTTTATTTGTTTTATGGACTTTTGGAACGATATTTTTTTTTTTTTTTTTTCTTCTCAAATTTTGGGTATCCCTTCAGGTGAT  
CAGATCTCTGTTTTTTCTCTTTATAATTTTTTTGGTCTGCTTGACAAATAAAATTTTTTTTTTAAATTTTTCTTTATAAAAAAAATATATAAAATAGGAC  
ATCTAATTACTAATTTAACAAATTGATAAAGGTTTATTAGAGGTGTGTGGGCTAGGGGTGTGTTCAATTTTTATTTTTCAAACCTAAAAGTTGAGTA  
GTTTACAATCGGGGTAGTATTTAATTATGCTTATGTTTTTTTTCTTGGGATACTTTTTTAAATTTTGCACCTTAAATTTAAATTTTGAAGGGGTTAAGT  
TAAAGTAACTGTGATCTTCAAAATCAGCTATGTAGGTGCAAGTCTACACTCTTGTAGTGCCTCAGTTGAAAGTCGGCTTTTATAAGGTACAATA  
TTGATGGTGTGTTTTCTGTTTTGTTTTATTGTTAAATTTTTTGGAGGTGTTATTTTCCCTTAAATAAAAAATAATTGATGTATAAGAAAGTTCTTAATGA  
AGTGCAATGGCGCCATCTTAACAAAAAGTTGTTACAAAAAGAACTTTATAAAAAAAGAGTATGGTGTAACTACTAACTTTTTTAAAAA  
ATCCCTAAATTTAAATGATGAGTTATATTAATATTTATGAAAAAATGGGCTAGTATTGGGTTTATTAGTAAGTTGCAAGTTTTTTGATGAGGT  
ATAGATTGAAAAATTTTGAATTATCGGTGGTGTAATCCTTCTCGTTATAGGAATACTCCTAGCTGTCTAGGAGTGGAATTCGAGGGGAGTTTTTAT  
AAAAGAAATTAATAAAAAAATTTGTTTGTGACGCTGCGGGTCCGCCCTGTAACGTGCTAGGGTTGAAGAAGAACGATCGTCAAAATATGCCCGGAA  
TATTGAAAATGAAATCGTGGGCGGAGCCGAAAACGAAGAGCTACCGGCGGCGTTTGCACCTTAGCCAACCCAGTGAGTACCGGAGTTCGAGAAA  
CCGAGGGAGATTGGGTTATTCAGATGAGGTTGGGATGCATTAATGGATTGTATTCAACTCTACAGAAGATCAAGAAGACGAATTAGTAG  
AGATGCTAATTGGGTGAGCAAACAGTGTAACGGCCGGAGAGTCAAACGAGGATATAGTATGTGCTAGGGGAGTGGGCAGAGGTAACATCCC  
CGAAGATTGAGGCGACGAATCAGAGGAGAACGCGTCTGAAGATTCAAACGACGAATAGGCGGAGGCCCATTTATTCAATATGTAAGAGATCG  
GGGGGGGGTGTGGGACCTCGCCCCGGTATTTGAACGATATGGTCTCTAATTTAGAAATTCGATGGGGGTTTCAACCAACCATAAAGATATTGGT  
AGTTTGTATTTAATTTTTGGTGAGGTTGCTGGTTAATTTGGAACGGCGTTTAGTATGCTTATACGACTAGAGCTTTCTGCGCCCGGAGCAATGTTAGG  
AGATGATCATCTTTATAATGTAATTTGTAACGGCATGCTTTTTATTATGATTTTTTTTTTGGTTATGCCGTTATGATTGGGGGGTTTGGTAATTGATTG  
GTCCCATATATATTGGGGCGCCGATATGGCGTTTCCCGACTAAACAATATTAGTTTTTIGACTTTTGCCCTTCTTTTATTATTAGGCTCT  
GCTTTTGTGAACAAGGGCGGGGACGGGTGAACAGTTTATCCTCCTTGTCTAGTATTCAAGCACACTCCGGATGTTGCGTTGATATGGTTATTTT  
TAGTCTTCATTTAGCTGGGTTTCTCTATTTTAGGTGCTATAAACTTTATTACTACAATTTTAAATGCGAGCCCCGGGTGTGCTTTTAAATAACTA  
CCTTTATTGTTTGATCTATTTAATAACAGCTTTTTATTACTTTTATCTTTACCTGTTTGTAGCTGGTGTATTACTATGTTGTTAACAGATAGAACTT  
TAATACGACTTTTTTCGATCCAGCGGGTGGCGGGACCCAATATTATTTCAGCATCTATTTGATTCTTTGGGCATCCAGAAGTTATATTTAATTTT  
GCCTGTTTTGGTATGATTTCTCAAATAATCCCGACTTTTGTGTCTAAAAACAAGTTTTCGGGTACTTAGGAATGGTTTATGCCATGCTTCTATTGG  
GCTTCTGGGATTTATTGTTGAGCTCATCATATGTTTACTGTGGGATGGATGTAGATACAAGAGCATATTTTACTGCTGCTACTATGATTATGCTGT  
GCCAATCGGGATTAAGTTTTTAGTTGGTTGGCAACTATTTATGGAGGTGTTCTTAGGTTAGAGACTCCAATGCTTTGAGCTATGGGGTTGTTTTTTT  
ATTTACAGTTGGTGGTTTAACTGGGGTTGTATTAGCAAATAGTCTCTTGATATTGTCTACATGATACATATTATGTAGTTGCGCATTTTCATTATGTT  
CTTTCTATGGGGGCTGTTTTGCTATCTTTGGGGGATTTACTATTGAATTGAAAAATAAGTGGTTATTGTTATAATGAATTTTTTGGGAAAGTTCAT  
TTTTGATTAATGTTTATCGGGGTTAATTTAACTTTTTTCCCTCAACATTTTTAGGTTTAGCAGGATTTCCAAGACGATACTCGGATTATGCAGATGCT  
TTTTGGGTGAAATTTAATAAGTCTTTAGGGTCTATTTCTATTTTGTAGTGTGTTTGGTTTTATATATTGTTTTGATCTTTTTGTTACAGAAGA  
AAAAATTTTGGGTGAAAAGAAGGATTTCTTTAGAATGAATCAATCTCTCCCCCTTATTTCATACTTATGAGGAGTTGCCTTTGTACAAAAATA  
AATAATTTTTAGAATAGTGCCGGTTATATACCGGTTT

## >RS\_LinB

TGTAAGAAAGACAAAGGGTTAGTCTTTGGGTTATGCCCAATAAGTGAGTTCGAATCTCTCTTACACAAAATAAAAAATTATAAAAAAAG  
AGGATAACTAAGATAAACTAAAATTAGACGATTTTTTCGAAATGGCGTTCAGTTGCTTATTGGTTGTTCTCCAGAAAAGTGATTTTTTAATTGA  
ATTGAAACATCTTATTACTAAGTAAAAATCAAACGAGATTCCGAGAGTGGCGGAGAGTGAAATTGGAGTTGTGCTGTGGTGGTCATAGATCTGC  
TTAAACATTAGTTTATACTGATAATGAGAGTACTGTAAAGGAAAGTTGAAAGAGAGTTGAAAGGAATTTGAATTTTTTATTTTGAAGTAGCTTTAA  
AAAAGCGTACCTTTTGATAATGGGTAAAAGAGATTTATTGGCATATTTAAAAATGGAAAAATTTTAAAGTAATTTTTTTTTTAGTCAAATTTCCCGAAA  
CCAAGTGATTTAATCATAAATGTGTGAGCAAAAAGTGGTATGTGGCAAAAATCTCAGAAAAATTTGTATTAGGGGTGAAAGGCTAATCGAACT  
TGGAAATAGCTGGTTTTCTGCGAAAAACTATTTAAGTAGTGTTCTTTTTTTTTTATTTTAAATTTGTCATTTTAAAAAAAACAAAAATAAAAAAAGTA  
AACAAAAATAAATGAAAAGATTTTTGTTAAAAAGAGAAAGTCAAATCAGAAGCTATTGTCATTTTTTTTTTCTTTAGTTTAAAAAAAATTAAT  
TTAGACAATAAAAAATGTAGGCTTGAACACGCACTTTTTAAAAAGTACGTAGTTGTTTATTTAAAAATTTTAAATTTTTTATAATTTTATGATGGTTA  
AAATAAACAGAAGCTCTGAAAATAATTATATATTTGTAGCAGAATAAATGTTTTCGATATTGAGTTGATTTCAAAATCTTTTTTAGTTTGAAAA  
ATTTTTTTTTTAATACATCGTATTCAGTTGAATAATTTTTACATAAGTAATCTAAATAATTATTTTTTTTCTTAAGATTACCTTAGTCAAGGATAATAC  
AGTTTCTAAAAAGAAATTTTTATGAAGATTTTTTATAAAAAATATATAATATCGGGAAAAGAAAAAAGAACTGTTTTCTAATTTAAAGAAA  
GAAAAAAGAAAGAAAAACATTTTTTAAGGAAGTCCGCAAGTTAACTTCGACTGTTTACCAAAAAACATAGCTTTTTGATCTTTATAAAAGGTG  
AAACCTGCCCCGATGGTTGTATCTTAATATGTTTGTCTCGTTACTAATAAGACAAATTAATGGCCGCGTAACACTGACTGTGATAATGTAGCGTA  
ATCAATTGTCAATTAATGTTGACCGGTATGAATGGTACCCGAAAGTTTTCTGTCTTAAAAAATAATTCATGAAATTAATTTGTAGTGAAGAT  
GCTACATTTTAATGTTAGACGAGAAGTCCCATGGAGCTTTACTGTAAGTTTATATATATAAATTTTTTTTTTATAAGCAAGACAGTTTTGTGGGG  
CGACAGTTTTTTAAAAAGTAACGAAAAATGAAGTATGACGCATGTTTAACTTTGAAATTTTTTAAATTGATGAGACATTTTGGTGTGTTTTTATGCCG  
TTATTTTGAATGAAAAAATAACGAAAAACAATAAAAGTTACCCTGGGATAACAGCGCAATAGTGTGAGAGTTAATTAACGACAGTGTGTCG  
ACCTCGATGTTGAATGTAAACGTCTACGGTGTAGTCACTCGTAAGGGTGTGTTGTTTCATCCATTAAAGTTGTACATGATTGAGTTAAAGCGGTGG  
TGACACAGCTTGGTTCTATCTACAATTAGAAAAACAAAAATATGTTGTTTTTTCGTACGAAAGGATCAAAAAATCAATAGTTCCCTTAAATAACTAT

TCITTTAAATTAGGATTGCTTCTAAAAATAAAAAGAAATATTTTGTGTTGTGTTTTATTAATGTATCTTTTAGTTTTATTTTTCCTTAATTGGAGCTG  
TTTTAACAGGTTGTTTTGGAAGAAAAATTGGAGAAAAGAGGAGCGGGGATTTAACTTCAAGTTGTTAGTTTTAGTTTGTCTTATTCTTTTTTAATCG  
CGATTGAAGTTTTATTTAATTCACAACAACGTAATTTGAAATTATGAAAAATGATTGTATCGGGGATTGTTGTGTTTTTTTGGTTTTCAATTTGATGA  
TTTAGTAGTTATTTATGTTATTTGTTGTTTTATTGTTTCTACTTTGGTTCATATTTTTTCTATTGCTTATATGCGGGGGGATCCTCATATTCCTCGATTTAT  
GACATATCTTCTTTGTTACTTTTTTAATGGTTTTGTGGTAACTAGTGATAATTTTCTTCAATTATTTATTTGGGTGAGAAGGGGTGGCCTTTGTCTCT  
ATTTATTAATTAATTTTTTGATTAACTCGATTAGAGGCAAATAGAGCTGCTATTAAAGCAATGTTAGTGAATAGAATTTGGTGATATTGGGGTTCCTTTA  
GCAATGTTTTTACTTTGGGATCTTTTTGGATCTCTAGATTTTTCTACAATTTTTAATCTATTTTTTTTTCTAATCAAATATTTTTATTTGTTATTTTTAT  
TTTTTGGGGTTATGGGAAAATCTGCTCAATTAGGATTACATACTTGATTACCGGATGCAATGGAAGGTTATTGGGCCTTTTAATAAAAAATTAATTA  
AAAAAATTACTATACATTAAAAAACAATTTATTAGTAAAATAATTGTTTATTAATGGACAATAAAATATTTATTTAATGTCTAAGAGACTTTATG  
TGATTTACTTTTTTTATTTGATTAAATCTATTAATTATTATTATTCCTTTACTTATTGCTGTGCATTTTTAACCTTAGCAGAACGAAAAATTTAGGGTA  
TATGCAAATAAGAAAAGGACCAAATGTTGTTGGAGGGGGCTTCTTCAACCTTTTGCAGATGGGGTGAATTTATTTATTAAGAAATGATTCCTCCC  
CATCAAGCAAATAAAATTTGTTATCTTTTGGCTCCAGTTATATCTTTTACATTAGCTTCTTTGTTTGGAGTTTTCTTCTTATAGAAAAGGAGTGAGTA  
TTAGTGATTTTAAAATTAGTCTTTTATGAATTTTGGCTATTTCTCTATTAGTGTATGCAATTTTAAATGCTGAGTGAAGCAAGTCTAAATATG  
CTTTTTTGGGTGCTATTCCGGCGCGCGCTCAAATGATTAGTTATGAGGTTTCAATTGGGCTAATTCCTATTTCGGTTTTATTATGTGTTGGTCTTTAAG  
TGTTACTGAAATTGTTTTAGCGCAAAAATAATGGTATTGTTTTTTTTTCCACTATTTCTGTTACAATAATGTTTTTGTCTCGATTTTAGCAGAGACT  
AATCGTGCTCCTTTTGATTAAACAGAAGGAGAGTCAGAGCTTGTTCGGGATATAATGTTGAGTATGCTTCGATGCTTTTTGCTTTATTTTTTCTTGCT  
GAATATGCACATATTATTTAATGAGTGTGTTAACAACGATTTTTTTTTTGGGAGGATGGCTTCTCCGATTCCAGATTTAAGGGTGGGGCTGGATG  
GTTTGGTTTTAAAGTGTGTTTTATTATTTTTTTTTTTTATTGAGTAAGGGCTTCATTTCTCGAATTCGATATGATCAGCTTATGGCTTGTATGAAAAAG  
GGTATTGCTTTAAGTTAGGAATGGTCATTTTTGTGGCTAGTGTCTCTTGGGTTTAAATGGCCCCCTCCTATTTAAAAATATTTAATTAATTATTA  
TGAAAAAAGAAAAAGAACTAACAGATTGCAAGTGCCATTACGAAAAAAGATCCTATTTTATTTTAAATCAACGGATTTTATGTTGATTTGGTTTC  
TCCTTCTAACATTACTTATTTATGAATTTTGGATCTTTATTTGGGATGTGTTTGTATTTTACAGATAGTCACTGGGTGTTTTGTCTATGCATTAATGTT  
CTGATGTTAAATTTTGCCTTTTGTCTTCAATTGGTCATATCATGCGAGATGTTAAATATGGGTTTTTATTAAGATATCTTCATGCTCAAGCTGCTTTTGT  
TTTTTTTTGTCTTTATGTTTATTTGGTCAAGTTTATATTATGGGGGTATTTAAAAATTCATGTTTGAAGCATTGGAGTTGTTATTTTTTTATTAACAA  
TGGCGATTGCCTTTATGGGCTATGTTTTGCCTTGGGGACAAATGTCTTTTGGGGGCAACTGTAATAACTAATTTATGTCTGCTATTCCTTATTTTTG  
GGATTGATATTGTTCACTGAGTGTGAGGCGGGTTAGTGTTCAAATGCAACATTAATCGGTTTTTATGTTACATTTTTACTTCTTTTATTTTATG  
TTTTCTGTATTTCTCAATTTAGTTTATTTACATGTGTAGGGTCTAATAATTCACAGGATTAATTTCTTCAATTGACGGAGTTTCATCCATACATTTTT  
ATACATCAAAAGATTTTTTTGGTTTTTTTTTCTTTTTTTTTTATTTTGTTTTTTGTTTTTTTTTTGCCAAATTTATTAGGAGATGCTGAAAAATTTATTC  
AGCGAATCTTTGGTTACTCCGGTTCACATTCAACCAGAAATGATATTTTTATTGCTTATGCAATCTTACGTTCTATACCAATAAAATAGGTGGGGT  
TATGCAATGTTTTGTAGTATCTTATTTATTTTTTATCTATTTTACATCAAAAGTCTTTTAAAGGGGCTTTTTTTCGCTCTTAGGTCGAATTCGATTT  
TTGGTTTTTAATTTAGTATTGTCTTTATTAACCTGAATTGGATCAACAAGTGTAGAGAAGCCTTTTATTTTAAATGGTCAAAATCTCTCTTTTTTTAT  
TTTTTATTTTTTAGTTTTAATACCAGTTTGGGTATTATTGAAATCAATTATTAATAAAAAATTAATGAAATTTTGTTTTAGGGGTTTTCTTTTGA  
GCTTCGTGGTTTTAAGTCTTCGTTATTTTCTTTTAAAACTTCTCTTTTTTATTTATTTATTTTGTTTTTTTTTTAAAAATTAGAATGGGCAAGCT  
TTTGGTTTTAATTGGTCTTTTGTCTATCTTTCTTTTATTGGACCAAAAAAGAGAACAACAGATGTGCTATTTAAGTTAATTTATGTTTTTGA  
GTTTTTGTATAATTTCTCAAGTAATTGACTTCTATTTATTAACCATGAACTTTTACTCTTTGTTTTTTATTTTGAATGCTCGAGGGTCTGGTTAT  
AGTGTGGAAGCAGGATTAATAATTTTATTTTGGGTGCTCTTTCTCTGGTTTATTTTATTTGGGTGTGCTTTATTATGTGGTATTGGGGCTAATATAC  
ACTTTTCTCAKATAGAACTTCTTTTAATTCAAAAACAAGTTTTTCTGCTGTTTCGATACCAATTTGGGTATCTTTAATTAATTGTGCTCTTTTTTAAA  
TTATCAGTTGCTCCTTTTCATATGTGAGTCCCTGATGTTTATGAGGGGGCACTACTAAAATGTTCTATTATTGGCTATTGTTCCAAATAAGGGTTT  
TTTTCTCTATAAATTTCAATTGGAATTGCCTGAAATTTTTTTTTTGGGATTTCTTTTTCTTTGTTTGTGGAGCCTTGGGTGATTTAAATCAAACTAA  
AATAAACGACTTTTGGCTTATAGTGGGGTGGTCATATGGGCTTTATTTATGAGGTTTGGAAAAATGGTCTTTTGAAAGTTTACAAGCTAGTCTTG  
TTATCTTTTTATATATAATTGTGATGACAATTTGTGCTTTTTCTATTATATTAAGTTTAAATGTTTATAAAAAATTTGCTTGTGAATTTAGTGGACTTCT  
CGATACCTTACCTTTTTTTCGATTACTTTAGGTGTCTTTTTTTTTCTATTGACAGGAGTCCCCCTTTGCTGGATTTTTGGAAAAATGATTTATTTGTTA  
TCTGGAATCTTCTCAAAATCATATTTTATTTTTTTTTTGTCTGTTTTTGTCTGTTATAGCTGGGTTTATTATATCGAATTATAAAAAATACTTTTTTT  
CAAAAAAATCTTTCTTTAATTACAATTAAGCTTTAAAAAAGAATCTAAATTAATTTTAAAAAAGTTTTTTAATTGGTTTTGTTTTTATTTTA  
TTCTTTTTTTTTCTTCTCCACATTTTCTTTTTTTTTTTTTTCTCAAAATAATTTTGATTTATTTTAAAAATGGAATTTTTTCTTTTTTTTTTATTTAGGG  
ATAATTGGCTCAGGAGTAATGGTTGTTTCAGCGTTAAATCCGTGTTCTTCTATTTTGTATTGGTTCTTGTTTTTATAAATCTGCAGTTTTTTCTTTT  
ACTAGGAATAGATTTTCTGCTTTGATGTTTTTACTTATTTATGTTGGGGCAATAGCTATTTTATTTTTATTGTTATTTTAAATCTAAGTACTAAGT  
ATCCTCCGGTTTTAAAAAGAGAGGTTGATATGACAAATTATATACCAATTGGATTTATAATTGGGATTTTTTTTTTTCAGAAATGCTTCAAGTGGA  
TTATTTTTGGGTCTTTTCAAAATAGAGAATTGAGACCTTTCTTTTCTTGGTTCTTATTTCTTATCATAATATCGAGGCCTTAGGCAGATTTTATATG  
TTCTTGTTTTGTTTATTTCTTTTGGCCAGTTTATTTTATTAGTGTCTATGATTGGTGTGATTGTAATTAAGTCAAGAAACAGAAATTTTAAAGTAAAA  
ACAAGATCTTTTTTCAAAATAACAGGTAATGAATAGTCTCTTATTTTGAACAATTTAATATAGTGTGATTGTTGGTTTTACGAATTCACAATA  
ATGATGACTTTTGTGATTATTGTCTTTTATTACTTTTTAAAGGAATTGAATTAATTCAAAAAGATGGCAGTCCGTTTATGAATATCTAGAAAAATTA  
TTTTTATTATATAACAGTGCAAAATTTAGGTAATGTGGGTAAATATATTTTTCTTTTATTGTTTCACTTTTGTTTTTTATGTTTTTAAATATTTAGG  
TTATGCCCCTACGCTTTACTCCGACAACCTCATATAATTGTTACTCTGGATTTCTTTTTCTATTGTTATTGGAGTAACTTTTCTGGGCTTTATAAAT  
TTAAAAAGATTTTTTTAGTATTTTAAATGCCGATGGGGCTCTTTGATTTTGGCACCACITTTAATTTTAAATAGAAAACAGTAAGTTATATCTCTCGGG  
CTGTTTCTTTGGGATTGTTTAGCCGCAATCTTCTGCCGGCATCTTTTATTGCAATTTTGGCAGGATTTGGTTTTGGTTTTTAAATTTGCAATGTC  
TATAATGGTGTTTATTACGCTATTAGAGGTGGCAGTTGCTATAATTCAGCCTATGTGTTTTGTCTGCTCACATTAATTTATTTAGCAGACACAATTTT  
TTTACATTAACATGACCGGATTAGAAAATTTTTTATTTACCATTGTGGGTGTTCAATAGGGTGTCAATTATGGGTTGTAGTGTGTGATATGGTCAT  
TCCTCTCAGAGCTGACTTCGGCATCAAATGGATCTTCAGAAAGCCTTGAATACGTCCATCCTTGAAATTTATTTGGTTATGTGCGTAATCAATTATAT  
TGCTCGGAGTATTGGGGTACAAGTGATGTAGAACCAAATGAGGCCGAGGTGTCTCTGAGAGATCTGGAGAAAACAAATGGGGCTTAAGTGGGA  
TTAGAGTAGAAAGTTTAAAGTGTGGAGTGAATAAGAAATTCGGGGATTAAGTGATTACATAGAACTAGTGGATTAAGTGATTTAAGTACAATTG  
GGGGATCAAGTGATTCAAGTACAATTTGGGGATTAAGTGATTCAAGTAGAATGCGGGCATTAAAGTGATTCAATTAGGATATCAAGTGATTCAAGCA  
CAATTTCAGCATTAAGTGATTAAAGTATAAATTAGGGGATCAAGTGATTCAATTTGGGGATCAAGTGATTCAATTTAGGAGATCAAGTGATTCAAGTA  
CAATTAGGGGATCAAGTGATTCAATTAGGGGAGGAAGTGATTCAATTAGAGGATCGAGTGATTCAAGTACAATTAGAGGATCGAGTGATTCAAGT  
ACAATTAGGGGATCGAGTGATTCAAGTACAATTAGGGGATCAAGTGATTCAAGTACAATTAGGGGATCAAGTGATTCAAGTACAAGGAGCAAGCAAG  
GTTAAGGGCAGTAAAGGTAGAAACACATTTAGGTGGTGACCAGTTAGCGTGTACAAATCAAGGTGGGGTTTTAAGAGAAAACAAGGTAGAAATTG  
ATGAGGCAGTTGACTCGACTCTTAGTTTCGATCCCTTTTGGGTGAAGGGATGATGGTTCAATGTGTGAATCAATTTGACATGGGTGTTAACATATTG

GCAGATAAGCCCCTGGTAGGCTGCATTTTTTATCTTACCGGCTTTAAAAATAACAAATCAAATGCCAAACCCACGGGTTTATAGGTGATTTATTT  
GGTATATATTTTATTAATCTTTGTCTTTTAAATGGTTAGTTAACGTATGGTCTCTGGCAAGCAGATTGGGGGGTTAGAAAGGGAGCTAAAAAGTT  
TAAAAATGTTTCTTTGTATTTGAATTAGCTAAAAATCAATAAAATTTTTATTTAAAGAATTTCTTTTGTGTTTGTATTGTAATGGTCTTATTTATTTAA  
TTGTTATTATGGCATTAGTTAACATCATAGGGACAGCGAGGGAGAGAAGATGTGTTTTAAAAAAGCGGGGTTAGAGTGGTCTTTGGCTTTATTGTT  
TAGTACTTTAGTTTTTGGGGTGGATTGACGGAGAAAGTCATTTTCAATTTTTAGTTTAGTAGAATGAAATATATTTCTACTTTAGATTGAGGCC  
GATTGTTTTTGCAGTCGATGGTGTTTCTTTGGTTTTTTTACTTTTAAACGACITTTTAAATCCAATTTGTATTTTAAATTAGCCAAAAATCAATAAAATTT  
TATTTAAAGAATTTCTTTGTGCTGTTTTTTTAGAAGTTTTATTAATAGGTGTTTTATAGTGTGATCTCTTTTGTTTTATCTTTTTTTGAGGGGA  
TATTAATACCAATGTTTTTTTAAATGGTATTTGAGGCTCTCGAGAAGAAAAGGTTCGTCTTTTTATTTTTTTTTTTTACTTTTATAGGCTCTCTC  
TTTTTTTTTTTTATAACTTTTTTATATCAAAGGATTGGAACAACAGACTATTTTCTTTTACTTAATATTAATTTTAAATATTCAAAAAATGAG  
CCTTAGTGGGATTTTCTTAGTTTTCGGTGAAACTACCTCTTATCCATTTTATATTTGATTGCCACAAGCACATGTTGAGGCTCCTGTTGCGGGCT  
CTGTTATTTTGGCTGGAATTTTATTAATAATAGGGGGTTATGGCCTTTTTCGTTTTCTTGACCTCTTTTCCGGGGGCTTCTTATATTGGTCTCCAGTT  
ATTGTTTTTTTTAGTGTGTGTGCTGTTTATGAGAGGCTAATGACATGTCTGCAAAATGATTTTAAACGGCTTGTGTCTTACTCTTCTGTGCTCATAT  
GGGACTGTGCTTTGGGCTTTTTACACATGTTATAGAGGGGTTAATGGGGCTCTTTTTTAAATGTTGGCGCACGGATTGTTAGCTCTGCTCTTTTT  
ATTGGAGTAACTTTTTGTATGATCGCCACCATACTCGTTTAAATAAAATATTATCGGGGTTGACITTTGACAAATGCCCTTTTTGTTATTTACAATGTTA  
ATTTGTCTTTGGCGAACATGGGTTTTCTCTTAGTTGTAATTTTGTGGAGAATTTTTCTTTTATTAGCAGTCTTCAATATCATTATGGAGTTGGAA  
TGTTTGTATTTTAGGGTCTTTTTCTGCAATTTATCTCTTAGTCTTTTTAATCGTATTTCTTTTGGTGGAGGATCTAATTATTACTTTTTAATAGAG  
ACTTAAGTCGACGAGAGATTTTGTAAATTTTCTTTCTTTTAAATATCTTAGGGGGGGGATTGTGCTTTTCTTATTATTGATTAAATAAAAATAG  
TCTGTTTTTAGCCAGGGTGTAGTCTCGGGTTTTAGGGAAGAAAAAATATTAGTCTAGGTATACATGCTAGTGTATGCGAACAGGTGAGGAT  
AAAAATAAAAAATTTTTTTATTGTTGTATTAAAAAAGAAAAAGTTTTTATTCTTTTTTGAAGATGCATAGTTAAACCACATTTTACTGAAACA  
AAAGAAAACCTTTGGCAGCAGTAATGGATTTATGTAATATACGAAAGTAAGACATAGGTGGGATAAAAAAATCTGTCAAATATAAGTGCCAGC  
AGACGCGGTAAAACTTAAGGATTTATTTTTAATAAAAAAGCAAAAAGCGTGTAAAGGATTTTTAAAAAAGAAAAAATAAGTAGAATTTTTTCGTA  
ATTGTGAAATGTTGGAATGAAAAAAGAAATTTTTATATGAAAAATAATTTATTTTTTTTCTTAAATACGAAGGTTTTGGGAGCAACAGGATTAG  
AGACCCTGGTAGTCTATACAGTAAAAGAATATCGCTTGAGTAGTACGGTCGCAAGATTGAAATCAAAAAGACTTGGCTGTTGCGTTGTTAATTAGA  
GGAGCGCTGCTTAATTGATAATCCGCGAGAGACCTTACCGAAGTTGAATTTATTAACAGGTGTGTCATGGCCGCTGTCATTTCTGTTTGA  
CAAAAAGGGGTTAATCTATCAAGGTGAAGTCAGGTATTATGACCCTTATATTTCGGGGTTAGGCGCGCTACATTTTCTCTTAAAAAGGAGGG  
GTTCCGATTGTTTTTAAAAATAAGATAATGAAGTTGGATTAAATAGTAATTGAAAAGTAGTGCGTTCAATGAACGTGAAAAACAATGTTAGTACAAAT  
AGCCCGTCGCCAGCCAGAAATAGGCTGTAAGTCGTAACATAGTAAGAGTGAGGGAAGTGGCTCTTGATGCAGTTTCATTGCTATCATTTAGTTGA  
GCCTTCTCCATGGCCTTTTGTGGAGCAATGGCTCTTTTTTATTACTGTGGTGCAGTGGTTTTTTTCAATATGGGTTAGTTTTTTTTATATTGGG  
GCTTTTGGTGTGTGGAGTTATGTTTGTGATGACAAGATGTTATACGAGAATCAACTTTCAAGGTCACCATCTTTAATGTAAAAACAAGGA  
TTAAATATGATGATTTTTTATTATCTTTCAGAAATTTGTTTTTTTTTTTGGGCTTTTTTTCATAGTAGTTAGCACCGGTGTTGAACTTG  
GAGTTGTTGGCCTCCACAAGGAATGTTGCATTAATCCCTTTTCTGTCTCTTATTAACACACTGCTGTATTATTAAGTTCTGGGCAACGGTTACAT  
GGGCGCACCATGCAATACTCTGTGGTTAAAAAAGAGGCTCAACTTGTCTTATTTTTAACTCTTTTTTGGGTGTTATGTTTACGGGGTTCAGCA  
TTTGAATATTATGAGGCGCTTTTACTTTATCTGACTCTGTTTATGGGCCACTTTTTTGTGCGACAGGGTTTCATGGACTACATGTTATAATTGTA  
CTACTTTCTTTTATTGTTTTTACGTTTACTCTTAATCAATTACTCGTCTCAACATGTGGGTTTGGAGCCGCGAGTTGATACTGGCAGTTTGTG  
GATGTGGTTTGATTATTTTATATTATGTAATTTATGATGAGGCTCATAAAAACTTCTTAAATGCAAAATCTTTTGTTTTTTACTTTTTTATGATATTT  
ATAAATGTTTTGGCTTGGTGTCTGTCTCTGTTTAAATCATCTTTATTTATTCGGACAGTCCAGAGACTTGACTTTTAGAGTTTCAAGATGTTGGGAT  
CCTATTGTAGAAGAAATGTTTTTTTTCATGACCAAGTTATGTTTTTAAATTAATATAGTTTACGTGTTTATGACTTTTTGTTGAATCTTTTAAAA  
TAAGTTTTATGATCGTCATTTAATCGATGGTACATTTTGAAGATTGTGAACGATTATTCCTGCTGTATATTGATTTTTATTGCAATGCTTCTCT  
AAATTATTATATTTAATGGATGAGTTATTTCTCCAGCTTTGACAATTAAGTTATTGGGCATCAATGATATTGATCCTATGAATATTCTGATTATGA  
AGGGGATACGTTAGGGTTGATTCTTATATGTTCTCTACTTCGGATTAGTTTCTGGAGAGAATCGTTGTTAGAAGTTGATTATAAATCTTTAATTCC  
TATCAAAACACATATAAGATTTTTAGTTACTGGGCAGATGTTTACATCTTTTGCAGTGCCTTCTTGGGGTTAAAAATGATGCGGTTCGGGTGCG  
TCTAAATCAAACTGGTGTTTTTATAAAACGAGCCGGGTTTTTTTGGACAATGTCTGAAATTTGTTGGGCAAAATCATCTTTTATGCCAATTGTGAT  
AAAGGGAGTTGGTTAAATGAATACGTTCAATATTTAAATATTTAAATGTATTATAAATACTTAGTTATTATTATTATTATTATTATTATTGGGAGT  
TGGGGTATAATTTAAATAGAGGACATTTTATTTATGCTTGTCTTATTGAATAGTTTATTATCAACTTTTTTTTTTTTTTAAATAGCTCTAAAGA  
AATAGACTTTTTATAGAACAATTTTTATGATTATGGGATACCTATGCTCGGCAGAAATCTTCAATTGGTTTAGCTATTTTAGTTCATATTATAG  
AATTCGGAACAATGTTTAAAACTTTTTAGTCTTTTGGCAGGATAATTGATTAATCTTTTTATTTTTTTTTTTTTTCTTATTTTGGCGGGTATT  
TATATTTTTCTTTTTTGATAGGGGAAAAAATCCAGATCGAGAAAAGGTTCTGCTTATGAATGTGGTTTTGCTCCCTTAAATTTTTAGGCAACC  
TTTTCAATACGTTTTTTTTAATTGGTATTTTATTCTGATTTTTGATTAGAAATCTTTTTTTTTTCCCTGATGTGTTTTATATAATCGACTGCTCCG  
TTTGGGTTTGAACATGATAGGTTTTTTTTTGTATTAGTTTTGGGTTGATATACGAATGAGTAATGGGGGGTTAGAATGGGAGTAAAAAGAGAG  
TAAAGAAAAAGTCTATCTATTATGAAATAATAGAAATTTATACCAACTCCGGTTCTGCTTTAATTCATGCTGCAACGATGGTTACTGCAGGT  
GTTTTTTATTAATTCGTGCTCTCCTTTATTGATGTGTCTCTTATATTAATTTATTTCAATCGTTGGGGTTTAAACCGTGTATTGTCAGGGAC  
AATTGGTTTAGTTCAAAATGATTTAAAAAATAATCGCTTATTCTACTGTAGTCAATTAGGTTATATGGTGTGTGCTGTGGGCTTCTCATTATGC  
AATTAGTCTTTTTCATCTTATGAATCATGCTTTTTTCAAAGCTTTATTATTTTGTAGTGCAGGGTCTTATTCATGCGGTAATTGATGAACAAGACAT  
AAGAAAAATGGGGGTTTTATTCTCTCTTTCCTTTGACTATGTTTTTTTGTATAGGCTCTTTTTCTTTAATGGGGTTTCTTTTTAACAGGATTTT  
ATTCAAAAGATTTAATTTAGAATTGCTTTTGGACAATTTATTTAATTTTGTGATTGATTAGGTGTTTTTCTGTTTTATTAACAATTTATATACTCT  
ATTCGTTAATTTATTTAGTTTTTTTATCCAATATTAATTTAAACGAGCAAAACATTTTTTTTCTTAAAGAAGGAGAATTTTTATTTTTAATCTTTGG  
GTATATTAACTTTAGGAAGTGTTTTTGAGGCTATTAAGTAAAGAAATAATTGGTCTTTTCAAATAGATGTTTTTCAATACTTTCTTTAAAAATAA  
AAATATTCCAATTTTATTTGTTTTATTGGACTTTTGGAACGATATTTTTTTTTTTTTTTTCTCTCAAAATTTTGGCTATCCCTTCAGGTGATCA  
GATCTCTGTTTTTCTCTTTATAATTTTTTGGTCTGCTTGACAAATAAATTTTTTTTTTAAATTTTTCTTTATAAAAAAATATATAAAATAGGACAT  
CTAATTAATAATTTAACAATTGATAAAGGTTTATTAGAGGTGTTGGGCTAGGGGTGTTGTTCAATTTTTTATTTTTCAAACCTCAAAAGTTGAGTAGT  
TTACAATCGGGGTTAGTATTAATATGCTTTAGTTTTTTCTTGGGATACTTTTTAAATTTTGCATTTAATTTAAATTTTGAAGGGGTTAAGTTA  
AAGTAAACTGTTGATCTTCAAAATCAGCTATGTAGGTGCAAGTCTACACTCTTATGAGTGCTCAGTTGAAAGTGGGCTTTTAAAGGTACAATATT  
GATGGTGTTTTTCTGTTTTGTTTTATTGTTAATTTTTTGGAGTGTATTTTTTCTTTAATAAAAAAATAATTGATGTATAAGAAAGTTCTAATGAAG  
TGCAATGGCGCCATCTTAACAAAAAGTTGGTTACAAAAAGAACTTTATAAAAAAAGAAAGTATGGTGTAAATACTAACTTTTTTAAATGATG  
AGTTATATTAATAATTTATGAAAAAATGGGCTAGTATTGGGTTATTAGTAAGTTGCAAGTTTTTTGATGAGGTATAGATTGAAAAATATTTGAT  
TATCGGTGGTGAATCCTTCTCGTTATAGGAATACTCCTAGCTGCTCCTAGGAGTGGATTTCGAGGGGAGTTTTTATAAATGTTTTAAAAAATTTGT

TTGTTGACGCTGCGGGTCCGCCCCGTAAACGTGCTAGGGTTGAAGAAGAACGATCGTCAAATATGCCCGGAATATTGAAAATGAAATCGTGGGC  
GGAGCCGAAAATGAAGCCGAGGCGGAGCCGAAGATGGGGCAGCGGGCGGAGCCGAAAAACGAAGAGCTACCGGCGCGTTTGACCTTTAGCC  
AACCCAGTGAGTACCGGAGTTTCGAGAAACCGAGGGAGATTTGGGTTATTACAGATGAGGTTTGGGATGCATTAATGGAATTCAGAAGATCAAGAA  
GACGAATTAGTAGAGATGCTAATTGGGTGAGCAAACAGTGTAACGGCCGGAGAGTCAAACGAGGATATAGTAGATGTGCTAGGGGAGTGGGCAG  
AGGGTAACATCCCCGAAGATTCAGGCGACGAATCAGAGGAGAACGCGTCTGAAGATTCAAACGACGAATAGGCGGAGGCCCCCATTTATTCAATA  
TGTAAGAGATCGGGGGGGGTTGTGGGACCTCGCCCCGGGTATTTGAACGATATGGTCTCTAATTATTGAATTCGATGGGGGTTTTCAACCAACCAT  
AAAGATATTGGTAGTTTGTATTTAATTTTTGGTGGAGGTGCTGGTTAATTGGAACGGCGTTTAGTATGCTTATACGACTAGAGCTTCTGCGCCCCG  
AGCAATGTAGGAGATGATCATCTTTATAATGTAATTGTTACAGCGCATGCTTTTATTATGATTTTTTTTTTGGTTATGCCGGTTATGATTGGGGGGTT  
TGTAATTGATTGGTCCCATTTATATATTGGGGCGCCGATATGGCGTTTCCCGACTAAACAATATTAGTTTTTGACTTTTGCCCCCTGCGCTTTTTT  
ATTATTAGGCTCTGCTTTTGTGAACAAGGGCGGGGACGGGGTGAACAGTTTATCTCCTCTTGCTAGTATTCAAGCACACTCCGGATGTTGCGTTG  
ATATGGTTATTTTTAGTCTTCATTTAGCTGGGTTTCTTCTATTTTAGGTGCTATAAACTTTATTACTACAATTTTTAATATGCGAGCCCCGGGTGTGTC  
TTTTAATAAACTACCTTTATTTGTTGATCTATTTAATAACAGCTTTTTTATTACTTTTATCTTTACCTGTTTTAGCTGGTGTCTATTACTATGTTGTTAAC  
AGATAGAACTTTAATACGACTTTTTTCGATCCAGCGGTGGCGGGGACCCAATATTATTTCAGCATCTATTTTGATTCTTTGGGCATCCAGAAGTTT  
ATATTTTAATTTTGCTGGTTTTGGTATGATTTCTCAAATAATCCCGACTTTTGTGTCTAAAAACAAGTTTTCGGGTACTTAGGAATGGTTTATGCCA  
TGCTTCTATTGGGCTTCTGGGATTTATTGTTTGAGCTCATCATATGTTTACTGTTGGGATGGATGTAGATACAAGAGCATATTTTACTGCTGCTACTA  
TGATTATTGCTGTGCCAACTGGGATTAAGTTTATTAGTTGGTTGGCAACTATTTATGGAGGTGTTCTTAGGTTAGAGACTCCAATGCTTTGAGCTATG  
GGGTTTGTTTTTTATTACAGTTGGTGGTTAACTGGGGTGTATTAGCAAATAGTTCCTTGATATTGTTCTACATGATACATATTATGTAGTTGCGC  
ATTTTCATTATGTTCTTCTATGGGGCTGTTTTGCTATTTTTGGGGGATTTTACTATTGAATTGGAAAAATAAGTGGTTATTGTTATAATGAATTTTT  
TGGGAAAGTTCATTTTGATTAATGTTTATCGGGGTTAATTTAACTTTTTCCCTCAACATTTTTAGGTTTAGCAGGATTTCCAAGACGATACTCGGA  
TTATGCAGATGCTTTTTTGGGTTGAAATTTAATAAGTTCCTTAGGGTCTATTATTTCTATTTGAGTGTGTTTGGTTTTATATATTGTTTTGATCTTTT  
TGTTACAGAAGAAAAATTTTTGGGTTGAAAAGAAGGATTTCTTTAGAATGAATTCATTTCTCCCCCTTATTCATACTTATGAGGAGTTGCCTTT  
GTACAAAAATAAATAGTTTTTAGAATAGTGCCGGGTTTATATACCGTTT

## Supplementary Data S2. Translated mtORF sequences of Pocilloporidae corals

### >EU400212.1 (NCBI Reference Sequence: NC\_011160.1) *Madracis mirabilis*

MPDLEIFFLCLLSGSVVINYSLCLCWYSARVQRWLLNMQVEPQEDGSYPIIHFWTFMNHVRRLLNNTREVAQREALEVEGPPVSEPEEVVIHIYENPLARGDVLNRNVYEGP  
VSEDEGATSQEIRGGVMETSLYERKSELIEPLSSPSFEGGGWMSHMPLEPIFGLIPFECVDILLHGPLISLIFLYRLLCYADQMVPNPRAFRLFLGFLFLVVILVLI

### >EF526303.1 *Pocillopora\_eydouxi*

MTAVEIFLCTIIGISLTVNYGFGIGWYSSSSQAWLRHQMGIDGTDMPVHPWAYFNFYVRQHSIARNVGVQVNLSTEGPNDVGQVQNQSESEQSVDDVFIELEGRRVPVRGV  
NLHVERRGYLDNRSNQEGVENSLGDQFEDVAFLGGSTSTLTPESVNRGAPSGNIRNVLSDSLIERRGQDQTLSEIKVETPPGASRGGRWASINQGEALRENKVEIGVLREN  
KVEIDEVVGSTFSSIPLEVEGMMAHVWNQFDMVFNILADKPLVGCIFFSYQLLRITNQMPNPRVYRWFALVYLLFIFVLLMV

### >EU400213.1 *Pocillopora\_damicornis*

MTAVEIFLCTIVIGISLTVNYGFGIGWYSSSSQAWLRHQMGIDGAERVHPWAYFNFYVRQHSIARNVGVQVNLSTEGPNDVGQVQNQSESEQSVDDVFIELEGRRVPVRGV  
TLHVERRGYLDNRSNQEGVENSLGDQFEDVAFLRESTSTITPESVNRGAPSGNIRNVLSDSLIERRGQDQTLSEIKVETPPGASRGGRWASINQGEALRENKVEIGVLRENK  
VEIDEVVGSTFSSIPLEVEGMMAHVWNQFDMVFNILADKPLVGCIFFSYQLLRITNQMPNPRVYRWFALVYLLFIFVLLMV

### >EF633601.2 *Seriatopora\_caliendrum*

MGELEIIFYIIFMVSSGLNWGFFVMWYNSSSQRWLRHQMGTDGWVHPHNYISYVRRHGIAERQVREGPTTEAMVYVESGGRPRNWGEEDSESESIANLRECVDRAIRQLES  
RENLREGETSALSESESRDNLRESVANALSESESRGDLRESVTRVLRRESRDETLRGGEAETVYCDGRVNIDEAVESTLSSISFEVGETMVHVWNQFDMFLNILACRPLVGC  
IFLSYQLLKIANQMPNPRVYRWFVLVYILLIFVFFLP

### >EF633600.2 *Seriatopora\_hystrix*

MSELEIIFYIIFVVSAGFNWGFVVMWYNSSSQRWLRHQMGTDWVHPHNYISYVRRHGIAERQVREGSTEVMYVESGRRPRNGGLEDGEPESENIENLRECVVRLRQLESR  
ENLREGETSALSESESRNLREGETSALSEAESRDNLRESVASALSESESRGDLRESVTRVLRRESRSQDETYVCDGRVNIDEAVESTLSSISFEVGETMVHVWNQFDMFLNILA  
CRPLVGCIFLSYQLLKIANQMPNPRVYRWFVLVYILLIFVFFFP

### >RS\_LinB

MTGLEIFLFTIVGVSIGCHYGFVVCWYGHSSQSWLRHQMDLPESLEYVHPWNYFGYVRNHYIARSIGVQVDVEPNEAGGVSESRGENNGALSIRVESLSSWSENIRIGLS  
DSHRTSGLSDLSTIGGSSDSTIWGLSDSSRMRAISDSIRISSDSTIRALSLSIIRGSSDSIGGSSGIGGSSDSTIRGSSDSIRGSSDSIRGSSDSTIRGSSDSTIRGSS  
SDSSTIRGSSDSCSEDETLRAVKVETHLGGDQLACTNQGGVLRNKVEIDEAVDSTLSSIPFEVEGMMVHVWNQFDMVFNILADKPLVGCIFLSYRLKITNQMPNPRVYR  
WFILVYILLIFVLLMV

### >RS\_LinA

MSGVEIFLCSLMGVSVCCNYAFMMAWYSQSSQRWLQHQMDDLPEPTEYVHPWTYYSYVRRHGIVHNGGVQVDQESNGADRPRDVIFIDLERRQVPLRGRVFRVAEND  
ESLCDNGNRLCHDEGLCDNDRLCVHGESLDDDSLCDNDEFQDGVHLHLSKASASESRGSLRESVIKALSESESRGSLRESIIKGLSDSRSEDEALRAVEVETHLSGGQLA  
RTNQGEAVESTLSSIPFEVEGMMVHVWNQFDMFLNILGDKPLVSCIFLCYQLLKITNQMPNPRVYRWFILVYILLIFVFLMI

### >EU400214.1 *Stylophora\_pistillata*

MSGVEIFLCSLMGVSVCFNYAFMMAWYSQSSQRWLQHQMDDLPEPTEYVHPWTYYSYVRRHGIVHNGGGDRPRDVIFIDLEGRQVPLRSRRFFRVAENDES LCDNGNRL  
CHDEGLCDNDRLCVHGESLDDDSLCDNDEFQDGVHLHLSKASASESRGSLRESVIKGLSESESRGSLRESVIKGLSESESRGSLRESVIKGLSDSRSEDEALRAVEVETHLS  
GGQLARTNQGEAVESTLSSIPFEVEGMMVHVWNQFDMFLSNILGDKPLVSCIFLSYQLLKITNQMPNPRVYRWFILVYISLIFVFLMV
