# Supplementary material for: Computational Characterization of the mtORF of Pocilloporid Corals: Insights into Protein Structure and Function in Stylophora Lineages from Contrasting Environments
Source: MDPI journal article supplement (doi:10.3390/genes10050324), 2019-04-27
Supplement: s1 [file s1]

Supplementary Table S1. Accession numbers of mtORF sequences analyzed in this study.

| Genera             | Accession numbers                                                                                                                                                                                                                                                                                                                                                                                             | References*                                                                                                                                                                                                                                                                                                                                                                                                                                                                                                             |
|--------------------|---------------------------------------------------------------------------------------------------------------------------------------------------------------------------------------------------------------------------------------------------------------------------------------------------------------------------------------------------------------------------------------------------------------|-------------------------------------------------------------------------------------------------------------------------------------------------------------------------------------------------------------------------------------------------------------------------------------------------------------------------------------------------------------------------------------------------------------------------------------------------------------------------------------------------------------------------|
| <i>Pocillopora</i> | EF526302-EF526303<br>EU374225-EU374261<br>FJ424084-FJ424129<br>FR729326-FR729399<br>HQ378758-HQ37861<br>JX624970-JX625077<br>JX983175-JX994088<br>KF583920-KF583950<br>KF709240-KF709244<br>KF985974-KF985980<br>KJ690905-KJ690907<br>KM215069-KM215131<br>KM610241-KM610280<br>KT879922-KT880039<br>KX5389810-KX539013<br>KY587458-KY587472<br>LC222444-LC222452<br>NC009797-NC009798 (complete mitogenomes) | Flot and Tillier 2007 [1]<br>Flot et al. 2008 [2]<br>Souter 2010 [3]<br>Flot et al. 2010 [4]<br>Pinzon and LaJeunesse 2011 [5]<br>Schmidt-Roach et al. 2013 [6]<br>Pinzon et al. 2013 [7]<br>Marti-Puig et al. 2014 [8]<br>Schmidt-Roach et al. 2014 [9]<br>Paz-García et al. 2015 [10]<br>Paz-García et al. 2015 [10]<br>Hsu et al. 2014 [11]<br>Baums et al. 2014 [12]<br>Gélin et al. 2017a [13]<br>Gélin et al. 2017b [14]<br>Poquita-Du et al. 2017 [15]<br>Nakajima et al. 2017 [16]<br>Flot and Tillier 2007 [1] |
| <i>Seriatopora</i> | NC010244-NC010245<br>EU622126-EU622176<br>HQ878445-HQ878586<br>KR150024-KR150046<br>KX618663<br>KY987919-KY988112<br>EF633600-EF633601 (complete mitogenomes)                                                                                                                                                                                                                                                 | Chen et al. 2008 [17]<br>Flot et al. 2008 [2]<br>Van Oppen et al. 2011 [18]<br>Warner et al. 2015 [19]<br>Gélin et al. 2017b [14]<br>Sinniger et al. 2017 [20]<br>Chen et al. 2008 [17]                                                                                                                                                                                                                                                                                                                                 |
| <i>Stylophora</i>  | FN674400- FN674440<br>JN558840- JN558909<br>NC_011162 (complete mitogenome)<br>EU400214 (complete mitogenome)                                                                                                                                                                                                                                                                                                 | Stefani et al. 2011 [21]<br>Flot et al. 2011 [22]<br>Chen et al. 2008 [17]<br>Chen et al. 2008 [17]                                                                                                                                                                                                                                                                                                                                                                                                                     |

#### References

1. Flot, J-F.; Tillier, S. The mitochondrial genome of *Pocillopora* (Cnidaria: Scleractinia) contains two variable regions: the putative D-loop and a novel ORF of unknown function. *Gene* **2007**, *401*, 80–87.
2. Flot, J-F.; Magalon, H.; Cruaud, C.; Couloux, A.; Tillier, S. Patterns of genetic structure among Hawaiian corals of the genus *Pocillopora* yield clusters of individuals that are compatible with morphology. *C. R. Biol.* **2008**, *331*, 239–247.
3. Souter, P. Hidden genetic diversity in a key model species of coral. *Mar. Biol.* **2010**, *157*, 875–885.
4. Flot, J-F.; Couloux, A.; Tillier, S. Haplowebs as a graphical tool for delimiting species: a revival of Doyle's "field for recombination" approach and its application to the coral genus *Pocillopora* in Clipperton. *BMC Evol. Biol.* **2010**, *10*, 372.
5. Pinzon, J.H.; LaJeunesse, T.C. Species delimitation of common reef corals in the genus *Pocillopora* using nucleotide sequence phylogenies, population genetics and symbiosis ecology. *Mol. Ecol.* **2011**, *20*, 311–325.
6. Schmidt-Roach, S.; Lundgren, P.; Miller, K.J.; Gerlach, G.; Noreen, A.M.E.; Andreakis, N. Assessing hidden species diversity in the coral *Pocillopora damicornis* from Eastern Australia. *Coral Reefs* **2013**, *32*, 161–172.

7. Pinzón, J.H.; Sampayo, E.; Cox, E.; Chauka, L.J.; Chen, C.A.; Voolstra, C.R.; LaJeunesse, T.C. Blind to morphology: genetics identifies several widespread ecologically common species and few endemics among Indo-Pacific cauliflower corals (*Pocillopora*, Scleractinia). *J. Biogeogr.* **2013**, *40*, 1595–1608.
8. Marti-Puig, P.; Forsman, Z.H.; Haverkort-Yeh, R.D.; Knapp, I.S.S.; Maragos, J.E.; Toonen, R.J. Extreme phenotypic polymorphism in the coral genus *Pocillopora*; micro-morphology corresponds to mitochondrial groups, while colony morphology does not. *Bull. Mar. Sci.* **2014**, *90*, 211–231.
9. Schmidt-Roach, S.; Miller, K.J.; Lundgren, P.; Andreakis, N. With eyes wide open: a revision of species within and closely related to the *Pocillopora damicornis* species complex (Scleractinia; Pocilloporidae) using morphology and genetics. *Zool. J. Linn. Soc.* **2014**, *170*, 1–33.
10. Paz-García, D.A.; Hellberg, M.E.; García-de-León, F.J.; Balart, E.F. Switch between morphospecies of *Pocillopora* corals. *Am. Nat.* **2015**, *186*, 434–440.
11. Hsu, C.-M.; de Palmas, S.; Kuo, C.-Y.; Denis, V.; Chen, C.A. Identification of scleractinian coral recruits using fluorescent censusing and DNA barcoding techniques. *PLoS One* **2014**, *9*, e107366.
12. Baums, I.B.; Devlin-Durante, M.; Laing, B.A.A.; Feingold, J.; Smith, T.; Bruckner, A.; Monteiro, J. Marginal coral populations: the densest known aggregation of *Pocillopora* in the Galápagos Archipelago is of asexual origin. *Front. Mar. Sci.* **2014**, *1*.
13. Gélín, P.; Postaire, B.; Fauvelot, C.; Magalon, H. Reevaluating species number, distribution and endemism of the coral genus *Pocillopora* Lamarck, 1816 using species delimitation methods and microsatellites. *Mol. Phylogenet. Evol.* **2017**, *109*, 430–446.
14. Gélín, P.; Fauvelot, C.; Mehn, V.; Bureau, S.; Rouzé, H.; Magalon, H. Superclone expansion, long-distance clonal dispersal and local genetic structuring in the coral *Pocillopora damicornis* type  $\beta$  in Reunion Island, south western Indian Ocean. *PLoS One* **2017**, *12*, e0169692.
15. Poquita-Du, R.; Ng, C.S.L.; Loo, J. Bin; Afiq-Rosli, L.; Tay, Y.C.; Todd, P.; Chou, L.M.; Huang, D. New evidence shows that *Pocillopora* 'damicornis-like' corals in Singapore are actually *Pocillopora acuta* (Scleractinia: Pocilloporidae). *Biodivers. Data J.* **2017**, *5*, e11407.
16. Nakajima, Y.; Wepfer, P.H.; Suzuki, S.; Zayas, Y.; Shinzato, C.; Satoh, N.; Mitarai, S. Microsatellite markers for multiple *Pocillopora* genetic lineages offer new insights about coral populations. *Sci. Rep.* **2017**.
17. Chen, C.A.; Chiou, C.-Y.Y.; Dai, C.-F.F.; Chen, C.A. Unique mitogenomic features in the scleractinian family pocilloporidae (Scleractinia: Astrocoeniina). *Mar. Biotechnol.* **2008**, *10*, 538–553.
18. Van Oppen, M.J.H.; Bongaerts, P.; Underwood, J.N.; Peplow, L.M.; Cooper, T.F. The role of deep reefs in shallow reef recovery: an assessment of vertical connectivity in a brooding coral from west and east Australia. *Mol. Ecol.* **2011**, *20*, 1647–1660.
19. Warner, P.A.; Van Oppen, M.J.H.; Willis, B.L. Unexpected cryptic species diversity in the widespread coral *Seriatopora hystrix* masks spatial-genetic patterns of connectivity. *Mol. Ecol.* **2015**, *24*, 2993–3008.
20. Sinniger, F.; Praselia, R.; Yorifuji, M.; Bongaerts, P.; Harii, S. *Seriatopora* diversity preserved in upper mesophotic coral ecosystems in southern Japan. *Front. Mar. Sci.* **2017**, *4*, 1–9.
21. Stefani, F.; Benzoni, F.; Yang, S.Y.; Pichon, M.; Galli, P.; Chen, C.A. Comparison of morphological and genetic analyses reveals cryptic divergence and morphological plasticity in *Stylophora* (Cnidaria, Scleractinia). *Coral Reefs* **2011**, *30*, 1033–1049.
22. Flot, J.-F.; Blanchot, J.; Charpy, L.; Cruaud, C.; Licuanan, W.Y.; Nakano, Y.; Payri, C.; Tillier, S. Incongruence between morphotypes and genetically delimited species in the coral genus *Stylophora*: phenotypic plasticity, morphological convergence, morphological stasis or interspecific hybridization? *BMC Ecol.* **2011**, *11*, 22.
